# Supplementary material for: Use of a Diels–Alder reaction to modify thermal expansion properties in charge-transfer cocrystals
Source: Royal Society of Chemistry journal article supplement (doi:10.1039/d2ce01207c), 2022-01-01
Supplement: d2ce01207c1.pdf [file d2ce01207c1.pdf]

## Supplementary Information

# Use of a Diels-Alder reaction to modify thermal expansion properties in charge-transfer cocrystals

Gary C. George III, Daniel K. Unruh, and Kristin M. Hutchins\*

Department of Chemistry and Biochemistry, Texas Tech University, Lubbock, Texas, 79409,  
United States.

Email: kristin.hutchins@ttu.edu

|                                                                    |         |
|--------------------------------------------------------------------|---------|
| 1. Materials, Synthesis, and Crystallization                       | S2-S3   |
| 2. X-ray Diffraction Information and Data Tables                   | S4-S17  |
| 3. Thermal Expansion Data and Intermolecular Interaction Distances | S18-S20 |
| 4. Expansivity Indicatrix Diagrams                                 | S21-S22 |
| 5. NMR Spectra of the Compounds                                    | S23-S25 |
| 6. Optical Microscope Images of Crystals                           | S26-S28 |
| 7. PXRD Patterns                                                   | S29-S30 |
| 8. Variation of the Unit Cell Parameters                           | S31-S32 |
| 9. Additional Figures                                              | S33     |
| 10. Variable-Temperature Stage Images                              | S34     |
| 11. References                                                     | S35     |

## 1. Materials, Synthesis, and Crystallization

### Materials

2,3-dichloromaleic anhydride (**DA1P**), thiourea, and 9-bromoanthracene (**BrAn**) were purchased from Oakwood Chemical. Allylamine was purchased from Arcos Organics. Magnesium sulfate, hexanes, chloroform, acetic acid, ethyl acetate, tetrahydrofuran (THF), and dichloromethane (DCM) were purchased from Fisher Chemical. Ethanol (200 proof) was purchased from Pharmco. All reagents were used as received.

### Synthesis of DA1

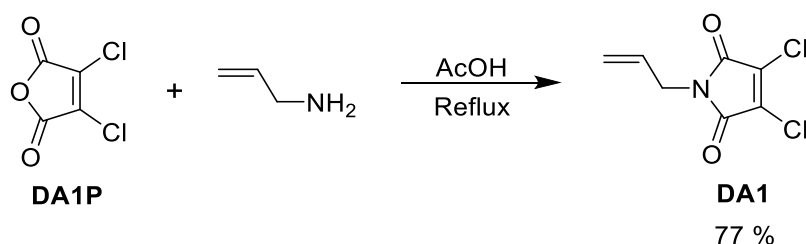

**DA1** was synthesized following a previously reported synthesis.<sup>1</sup> In the first step, 1 g (6.0 mmol) of **DA1P** and 0.34 g (6.0 mmol) of allylamine were dissolved in THF (10 mL), and the THF was removed in vacuo. Next, 50 mL of glacial acetic acid was added to the mixture, which was then refluxed for 1.5 hours. The solvent was then removed in vacuo, and the resulting oil was refrigerated overnight, which allowed for crystallization of the crude product. The solid was then dissolved in DCM and purified via column chromatography, using an 80:20 mixture of hexane to ethyl acetate. The purified product weighed 0.9506 g, which resulted in a percent yield of 77%.

### Synthesis of DA2

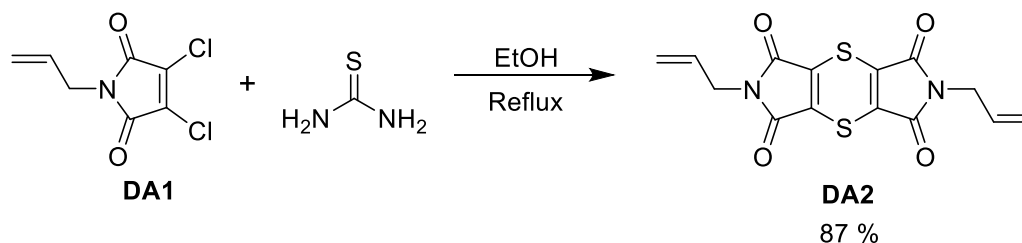

**DA2** was synthesized following a previously reported synthesis.<sup>1</sup> In the first step, 0.200 g (0.97 mmol) of **DA1** was dissolved in ethanol (15 mL) in a 50 mL round bottom flask and heated to 80 °C. While heating, 0.074 g (0.97 mmol) of thiourea was added to a vial and

dissolved in ethanol (10 mL). The thiourea solution was added to the reaction flask, and the solution was refluxed for 2 hours. The reaction was cooled, the solvent was removed in vacuo, and the resulting green solid was dissolved in DCM and washed with water (20 mL portions, 3 times). A final washing was done with brine, followed by drying the organic layer with anhydrous magnesium sulfate. The organic layer was filtered and concentrated under vacuum, which gave 0.1421 g of **DA2**, resulting in a percent yield of 87%.

**Crystallization of DA2-BrAn polymorphs.** Single crystals were grown using two different methods, with each method giving a different proportion of each polymorph. Slow evaporation from a concentrated solution of DCM with 0.0150 g (0.045 mmol, 1 eq) of **DA2** and 0.0116 g (0.045 mmol, 1 eq) of **BrAn** over 2 days favored the head-to-head (H-H) polymorph. On the other hand, vapor diffusion with 0.0150 g (0.045 mmol, 1 eq) of **DA2** and 0.0116 g (0.045 mmol, 1 eq) of **BrAn** favored the head-to-tail (H-T) polymorph (see PXRD section). Vapor diffusion was conducted over a period of 2 days by dissolving both components in approximately 4 mL of DCM in an 8 mL vial, which was placed inside a 20 mL vial containing approximately 4 mL of hexanes. The H-T plates obtained from slow evaporation were smaller in size when compared to the vapor diffusion method.

**Cycloaddition reactions.** Cycloaddition reactions were conducted by placing the vials with crystals from either slow evaporation or vapor diffusion inside of an oven at 40-50 °C for ca. 1 month, or at 90-100 °C for a week.

**Crystallization of DA2-BrAn Cycloadduct (CA) Nonsolvate.** Single crystals were grown by dissolving approximately 0.0200 g of the reacted solid (mixture of H-H and H-T) in chloroform and allowing the solution to evaporate slowly over 3-4 days.

**Crystallization of DA2-BrAn CA Solvate.** Single crystals were grown by dissolving approximately 0.0200 g of the reacted solid (mixture of H-H and H-T) in DCM and allowing the solution to evaporate slowly over 2 days.

## 2. X-ray Diffraction Information and Data Tables

Data were collected on a Rigaku XtaLAB Synergy-*i*Kappa diffractometer equipped with a PhotonJet-*i* X-ray source operated at 50 W (50 kV, 1 mA) to generate Cu K $\alpha$  radiation ( $\lambda = 1.54178 \text{ \AA}$ ), or Mo K $\alpha$  radiation ( $\lambda = 0.71073 \text{ \AA}$ ) and a HyPix-6000HE HPC (hybrid photon counting) detector. Crystals were transferred from the vial and placed on a glass slide in type NVH immersion oil by Cargille. A Zeiss Stemi 305 microscope was used to identify a suitable specimen for X-ray diffraction from a representative sample of the material. The crystal and a small amount of the oil were collected on a Hampton Research 20 micron nylon loop, a 50 micron MiTeGen cryoloop, or a 200 micron MiTeGen cryoloop and transferred to the instrument where it was placed under a cold nitrogen stream (Oxford). Data were collected at temperatures from 100 K to 300 K in 20 K increments with a transition rate of 2 K/minute between the temperatures. The sample was optically centered with the aid of a video camera to ensure that no translations were observed as the crystal was rotated through all positions. The crystal was measured for size, morphology, and color.

After data collection, the unit cell was re-determined using a subset of the full data collection for each temperature. Intensity data were corrected for Lorentz, polarization, and background effects using *CrysAlis<sup>Pro</sup>*.<sup>2</sup> A numerical absorption correction was applied based on a Gaussian integration over a multifaceted crystal and followed by a semi-empirical correction for adsorption applied using the program *SCALE3 ABSPACK*.<sup>3</sup> The program *SHELXT*<sup>4</sup> was used for the initial structure solution and *SHELXL*<sup>5</sup> was used for the refinement of the structures. Both of these programs were utilized within the *OLEX2*<sup>6</sup> software. Hydrogen atoms bound to carbon atoms were located in the difference Fourier map and were geometrically constrained using the appropriate AFIX commands.

In all four crystal structures, both of the allyl side chains are dynamically disordered at varying temperatures. These were modelled by splitting the respective carbons into parts (A and B) and letting each side chain freely refine independently. The refined occupancies of the A and B sites varied depending on temperature, and the two parts for each side chain were constrained to a total sum of one. To maintain reasonable bond lengths and ADPs for the disordered sites, RIGU, SIMU, and free variable DFIX restraints were applied where applicable. Hydrogen atoms bound to carbon atoms were geometrically constrained using the appropriate AFIX commands. In both cycloadducts, the bromine atom is positionally disordered through rotation of the molecule, with the disorder in the nonsolvate of 7%, and 5%

for the solvate structure. This was modelled using a free variable DFIX command. The nonsolvate cycloadduct exhibited disorder and showed larger thermal ellipsoids due to a static positional disorder of one of the sulfur atoms. This was modelled using a free variable DFIX command. Specifics about the disorder and modelling of these four structures can be found in the CIFs.

**Table S1.** X-ray data for **DA2-BrAn H-T** at 300, 280, 260, and 240 K.

| compound formula                                                           | C <sub>28</sub> H <sub>19</sub> BrN <sub>2</sub> O <sub>4</sub> S <sub>2</sub> | C <sub>28</sub> H <sub>19</sub> BrN <sub>2</sub> O <sub>4</sub> S <sub>2</sub> | C <sub>28</sub> H <sub>19</sub> BrN <sub>2</sub> O <sub>4</sub> S <sub>2</sub> | C <sub>28</sub> H <sub>19</sub> BrN <sub>2</sub> O <sub>4</sub> S <sub>2</sub> |
|----------------------------------------------------------------------------|--------------------------------------------------------------------------------|--------------------------------------------------------------------------------|--------------------------------------------------------------------------------|--------------------------------------------------------------------------------|
| formula mass                                                               | 591.48                                                                         | 591.48                                                                         | 591.48                                                                         | 591.48                                                                         |
| crystal system                                                             | monoclinic                                                                     | monoclinic                                                                     | monoclinic                                                                     | monoclinic                                                                     |
| space group                                                                | <i>P2<sub>1</sub>/n</i>                                                        | <i>P2<sub>1</sub>/n</i>                                                        | <i>P2<sub>1</sub>/n</i>                                                        | <i>P2<sub>1</sub>/n</i>                                                        |
| <i>a</i> /Å                                                                | 12.8724(2)                                                                     | 12.8651(3)                                                                     | 12.86180(10)                                                                   | 12.85730(10)                                                                   |
| <i>b</i> /Å                                                                | 13.7868(3)                                                                     | 13.7494(3)                                                                     | 13.7157(2)                                                                     | 13.6803(2)                                                                     |
| <i>c</i> /Å                                                                | 14.7545(3)                                                                     | 14.7302(4)                                                                     | 14.7240(2)                                                                     | 14.7126(2)                                                                     |
| $\alpha$ /°                                                                | 90                                                                             | 90                                                                             | 90                                                                             | 90                                                                             |
| $\beta$ /°                                                                 | 107.441(2)                                                                     | 107.516(2)                                                                     | 107.5340(10)                                                                   | 107.5780(10)                                                                   |
| $\gamma$ /°                                                                | 90                                                                             | 90                                                                             | 90                                                                             | 90                                                                             |
| <i>V</i> /Å <sup>3</sup>                                                   | 2498.09(9)                                                                     | 2484.77(11)                                                                    | 2476.76(5)                                                                     | 2466.99(5)                                                                     |
| $\rho_{\text{calc}}$ /g cm <sup>-3</sup>                                   | 1.573                                                                          | 1.581                                                                          | 1.586                                                                          | 1.593                                                                          |
| T/K                                                                        | 300.05(10)                                                                     | 280.05(10)                                                                     | 260.06(10)                                                                     | 240.05(10)                                                                     |
| <i>Z</i>                                                                   | 4                                                                              | 4                                                                              | 4                                                                              | 4                                                                              |
| radiation type                                                             | CuK $\alpha$                                                                   | CuK $\alpha$                                                                   | CuK $\alpha$                                                                   | CuK $\alpha$                                                                   |
| absorption coefficient, $\mu$ /mm <sup>-1</sup>                            | 4.136                                                                          | 4.158                                                                          | 4.172                                                                          | 4.188                                                                          |
| crystal size/mm <sup>3</sup>                                               | 0.233 × 0.157 × 0.103                                                          | 0.233 × 0.157 × 0.103                                                          | 0.233 × 0.157 × 0.103                                                          | 0.233 × 0.157 × 0.103                                                          |
| no. of reflections measured                                                | 42660                                                                          | 41163                                                                          | 44913                                                                          | 46163                                                                          |
| no. of independent reflections                                             | 5142                                                                           | 5163                                                                           | 5153                                                                           | 5132                                                                           |
| no. of reflections ( <i>I</i> > 2 $\sigma$ ( <i>I</i> ))                   | 4048                                                                           | 4187                                                                           | 4326                                                                           | 4387                                                                           |
| <i>R</i> <sub>int</sub>                                                    | 0.0566                                                                         | 0.0556                                                                         | 0.0501                                                                         | 0.0484                                                                         |
| <i>R</i> <sub>1</sub> ( <i>I</i> > 2 $\sigma$ ( <i>I</i> ))                | 0.0314                                                                         | 0.0316                                                                         | 0.0284                                                                         | 0.0277                                                                         |
| w <i>R</i> ( <i>F</i> <sup>2</sup> ) ( <i>I</i> > 2 $\sigma$ ( <i>I</i> )) | 0.0777                                                                         | 0.0812                                                                         | 0.0745                                                                         | 0.0720                                                                         |
| <i>R</i> <sub>1</sub> (all data)                                           | 0.0457                                                                         | 0.0426                                                                         | 0.0369                                                                         | 0.0349                                                                         |
| w <i>R</i> ( <i>F</i> <sup>2</sup> ) (all data)                            | 0.0915                                                                         | 0.0911                                                                         | 0.0823                                                                         | 0.0792                                                                         |

|                        |         |         |         |         |
|------------------------|---------|---------|---------|---------|
| Goodness-of-fit        | 1.045   | 1.038   | 1.054   | 1.012   |
| CCDC deposition number | 2179716 | 2179715 | 2179714 | 2179713 |

**Table S2.** X-ray data for **DA2-BrAn H-T** at 220, 200, 180, and 160 K.

| compound formula                                                           | C <sub>28</sub> H <sub>19</sub> BrN <sub>2</sub> O <sub>4</sub> S <sub>2</sub> | C <sub>28</sub> H <sub>19</sub> BrN <sub>2</sub> O <sub>4</sub> S <sub>2</sub> | C <sub>28</sub> H <sub>19</sub> BrN <sub>2</sub> O <sub>4</sub> S <sub>2</sub> | C <sub>28</sub> H <sub>19</sub> BrN <sub>2</sub> O <sub>4</sub> S <sub>2</sub> |
|----------------------------------------------------------------------------|--------------------------------------------------------------------------------|--------------------------------------------------------------------------------|--------------------------------------------------------------------------------|--------------------------------------------------------------------------------|
| formula mass                                                               | 591.48                                                                         | 591.48                                                                         | 591.48                                                                         | 591.48                                                                         |
| crystal system                                                             | monoclinic                                                                     | monoclinic                                                                     | monoclinic                                                                     | monoclinic                                                                     |
| space group                                                                | <i>P2<sub>1</sub>/n</i>                                                        | <i>P2<sub>1</sub>/n</i>                                                        | <i>P2<sub>1</sub>/n</i>                                                        | <i>P2<sub>1</sub>/n</i>                                                        |
| <i>a</i> /Å                                                                | 12.85490(10)                                                                   | 12.85220(10)                                                                   | 12.85000(10)                                                                   | 12.84750(10)                                                                   |
| <i>b</i> /Å                                                                | 13.64830(10)                                                                   | 13.6143(2)                                                                     | 13.58420(10)                                                                   | 13.55560(10)                                                                   |
| <i>c</i> /Å                                                                | 14.70060(10)                                                                   | 14.6879(2)                                                                     | 14.6753(2)                                                                     | 14.6645(2)                                                                     |
| $\alpha$ /°                                                                | 90                                                                             | 90                                                                             | 90                                                                             | 90                                                                             |
| $\beta$ /°                                                                 | 107.6290(10)                                                                   | 107.6790(10)                                                                   | 107.7230(10)                                                                   | 107.7640(10)                                                                   |
| $\gamma$ /°                                                                | 90                                                                             | 90                                                                             | 90                                                                             | 90                                                                             |
| <i>V</i> /Å <sup>3</sup>                                                   | 2458.06(3)                                                                     | 2448.62(5)                                                                     | 2440.10(4)                                                                     | 2432.14(4)                                                                     |
| $\rho_{\text{calc}}$ /g cm <sup>-3</sup>                                   | 1.598                                                                          | 1.604                                                                          | 1.610                                                                          | 1.615                                                                          |
| T/K                                                                        | 220.05(10)                                                                     | 200.05(10)                                                                     | 180.06(10)                                                                     | 160.06(10)                                                                     |
| <i>Z</i>                                                                   | 4                                                                              | 4                                                                              | 4                                                                              | 4                                                                              |
| radiation type                                                             | CuK $\alpha$                                                                   | CuK $\alpha$                                                                   | CuK $\alpha$                                                                   | CuK $\alpha$                                                                   |
| absorption coefficient,<br>$\mu$ /mm <sup>-1</sup>                         | 4.204                                                                          | 4.220                                                                          | 4.235                                                                          | 4.248                                                                          |
| crystal size/mm <sup>3</sup>                                               | 0.233 × 0.157 ×<br>0.103                                                       | 0.233 × 0.157 ×<br>0.103                                                       | 0.233 × 0.157 ×<br>0.103                                                       | 0.233 × 0.157 ×<br>0.107                                                       |
| no. of reflections measured                                                | 46057                                                                          | 45046                                                                          | 44835                                                                          | 45208                                                                          |
| no. of independent<br>reflections                                          | 5123                                                                           | 5108                                                                           | 5089                                                                           | 5086                                                                           |
| no. of reflections ( <i>I</i> > 2 $\sigma$ ( <i>I</i> ))                   | 4462                                                                           | 4517                                                                           | 4562                                                                           | 4616                                                                           |
| <i>R</i> <sub>int</sub>                                                    | 0.0477                                                                         | 0.0443                                                                         | 0.0421                                                                         | 0.0422                                                                         |
| <i>R</i> <sub>1</sub> ( <i>I</i> > 2 $\sigma$ ( <i>I</i> ))                | 0.0274                                                                         | 0.0258                                                                         | 0.0278                                                                         | 0.0266                                                                         |
| w <i>R</i> ( <i>F</i> <sup>2</sup> ) ( <i>I</i> > 2 $\sigma$ ( <i>I</i> )) | 0.0710                                                                         | 0.0674                                                                         | 0.0731                                                                         | 0.0710                                                                         |
| <i>R</i> <sub>1</sub> (all data)                                           | 0.0335                                                                         | 0.0310                                                                         | 0.0324                                                                         | 0.0303                                                                         |
| w <i>R</i> ( <i>F</i> <sup>2</sup> ) (all data)                            | 0.0774                                                                         | 0.0725                                                                         | 0.0780                                                                         | 0.0747                                                                         |
| Goodness-of-fit                                                            | 1.040                                                                          | 1.052                                                                          | 1.049                                                                          | 1.040                                                                          |
| CCDC deposition number                                                     | 2179712                                                                        | 2179711                                                                        | 2179710                                                                        | 2179709                                                                        |

**Table S3.** X-ray data for **DA2-BrAn H-T** at 140, 120, and 100 K.

| compound formula                              | C <sub>28</sub> H <sub>19</sub> BrN <sub>2</sub> O <sub>4</sub> S <sub>2</sub> | C <sub>28</sub> H <sub>19</sub> BrN <sub>2</sub> O <sub>4</sub> S <sub>2</sub> | C <sub>28</sub> H <sub>19</sub> BrN <sub>2</sub> O <sub>4</sub> S <sub>2</sub> |
|-----------------------------------------------|--------------------------------------------------------------------------------|--------------------------------------------------------------------------------|--------------------------------------------------------------------------------|
| formula mass                                  | 591.48                                                                         | 591.48                                                                         | 591.48                                                                         |
| crystal system                                | monoclinic                                                                     | monoclinic                                                                     | monoclinic                                                                     |
| space group                                   | <i>P2<sub>1</sub>/n</i>                                                        | <i>P2<sub>1</sub>/n</i>                                                        | <i>P2<sub>1</sub>/n</i>                                                        |
| a/Å                                           | 12.84410(10)                                                                   | 12.84010(10)                                                                   | 12.8343(2)                                                                     |
| b/Å                                           | 13.53080(10)                                                                   | 13.50710(10)                                                                   | 13.4844(2)                                                                     |
| c/Å                                           | 14.6539(2)                                                                     | 14.6451(2)                                                                     | 14.6371(2)                                                                     |
| α/°                                           | 90                                                                             | 90                                                                             | 90                                                                             |
| β/°                                           | 107.8020(10)                                                                   | 107.8340(10)                                                                   | 107.8630(10)                                                                   |
| γ/°                                           | 90                                                                             | 90                                                                             | 90                                                                             |
| V/Å <sup>3</sup>                              | 2424.77(4)                                                                     | 2417.89(4)                                                                     | 2411.02(6)                                                                     |
| ρ <sub>calc</sub> /g cm <sup>-3</sup>         | 1.620                                                                          | 1.625                                                                          | 1.629                                                                          |
| T/K                                           | 140.05(10)                                                                     | 120.03(12)                                                                     | 99.9(4)                                                                        |
| Z                                             | 4                                                                              | 4                                                                              | 4                                                                              |
| radiation type                                | CuKα                                                                           | CuKα                                                                           | CuKα                                                                           |
| absorption coefficient,<br>μ/mm <sup>-1</sup> | 4.261                                                                          | 4.273                                                                          | 4.286                                                                          |
| crystal size/mm <sup>3</sup>                  | 0.233 × 0.157 ×<br>0.103                                                       | 0.233 × 0.157 ×<br>0.103                                                       | 0.233 × 0.157 ×<br>0.103                                                       |
| no. of reflections measured                   | 44828                                                                          | 44635                                                                          | 44546                                                                          |
| no. of independent<br>reflections             | 5075                                                                           | 5072                                                                           | 5042                                                                           |
| no. of reflections (I > 2σ(I))                | 4663                                                                           | 4695                                                                           | 4728                                                                           |
| R <sub>int</sub>                              | 0.0417                                                                         | 0.0409                                                                         | 0.0414                                                                         |
| R <sub>1</sub> (I > 2σ(I))                    | 0.0266                                                                         | 0.0260                                                                         | 0.0266                                                                         |
| wR(F <sup>2</sup> ) (I > 2σ(I))               | 0.0711                                                                         | 0.0706                                                                         | 0.0707                                                                         |
| R <sub>1</sub> (all data)                     | 0.0295                                                                         | 0.0287                                                                         | 0.0288                                                                         |
| wR(F <sup>2</sup> ) (all data)                | 0.0741                                                                         | 0.0733                                                                         | 0.0729                                                                         |
| Goodness-of-fit                               | 1.053                                                                          | 1.063                                                                          | 1.064                                                                          |
| CCDC deposition number                        | 2179708                                                                        | 2179707                                                                        | 2179706                                                                        |

**Table S4.** X-ray data for **DA2-BrAn H-H** at 300, 280, 260, and 240 K.

| compound formula                                                           | C <sub>28</sub> H <sub>19</sub> BrN <sub>2</sub> O <sub>4</sub> S <sub>2</sub> | C <sub>28</sub> H <sub>19</sub> BrN <sub>2</sub> O <sub>4</sub> S <sub>2</sub> | C <sub>28</sub> H <sub>19</sub> BrN <sub>2</sub> O <sub>4</sub> S <sub>2</sub> | C <sub>28</sub> H <sub>19</sub> BrN <sub>2</sub> O <sub>4</sub> S <sub>2</sub> |
|----------------------------------------------------------------------------|--------------------------------------------------------------------------------|--------------------------------------------------------------------------------|--------------------------------------------------------------------------------|--------------------------------------------------------------------------------|
| formula mass                                                               | 591.48                                                                         | 591.48                                                                         | 591.48                                                                         | 591.48                                                                         |
| crystal system                                                             | triclinic                                                                      | triclinic                                                                      | triclinic                                                                      | triclinic                                                                      |
| space group                                                                | <i>P-1</i>                                                                     | <i>P-1</i>                                                                     | <i>P-1</i>                                                                     | <i>P-1</i>                                                                     |
| <i>a</i> /Å                                                                | 7.36340(10)                                                                    | 7.34440(10)                                                                    | 7.32560(10)                                                                    | 7.30960(10)                                                                    |
| <i>b</i> /Å                                                                | 10.50400(10)                                                                   | 10.50070(10)                                                                   | 10.50030(10)                                                                   | 10.49630(10)                                                                   |
| <i>c</i> /Å                                                                | 17.22370(10)                                                                   | 17.20520(10)                                                                   | 17.18510(10)                                                                   | 17.16230(10)                                                                   |
| $\alpha$ /°                                                                | 74.3220(10)                                                                    | 74.2550(10)                                                                    | 74.1950(10)                                                                    | 74.1460(10)                                                                    |
| $\beta$ /°                                                                 | 83.2550(10)                                                                    | 83.3210(10)                                                                    | 83.4010(10)                                                                    | 83.4770(10)                                                                    |
| $\gamma$ /°                                                                | 86.4410(10)                                                                    | 86.4110(10)                                                                    | 86.3720(10)                                                                    | 86.3390(10)                                                                    |
| <i>V</i> /Å <sup>3</sup>                                                   | 1273.09(2)                                                                     | 1267.77(2)                                                                     | 1262.79(2)                                                                     | 1257.73(2)                                                                     |
| $\rho_{\text{calc}}$ /g cm <sup>-3</sup>                                   | 1.543                                                                          | 1.549                                                                          | 1.556                                                                          | 1.562                                                                          |
| T/K                                                                        | 300.05(10)                                                                     | 280.04(10)                                                                     | 260.04(10)                                                                     | 240.04(10)                                                                     |
| <i>Z</i>                                                                   | 2                                                                              | 2                                                                              | 2                                                                              | 2                                                                              |
| radiation type                                                             | CuK $\alpha$                                                                   | CuK $\alpha$                                                                   | CuK $\alpha$                                                                   | CuK $\alpha$                                                                   |
| absorption coefficient,<br>$\mu$ /mm <sup>-1</sup>                         | 4.058                                                                          | 4.075                                                                          | 4.091                                                                          | 4.108                                                                          |
| crystal size/mm <sup>3</sup>                                               | 0.157 × 0.07 ×<br>0.049                                                        |
| no. of reflections measured                                                | 42812                                                                          | 44209                                                                          | 44135                                                                          | 45148                                                                          |
| no. of independent<br>reflections                                          | 4537                                                                           | 4537                                                                           | 4517                                                                           | 4498                                                                           |
| no. of reflections ( <i>I</i> > 2 $\sigma$ ( <i>I</i> ))                   | 3920                                                                           | 3988                                                                           | 4048                                                                           | 4079                                                                           |
| <i>R</i> <sub>int</sub>                                                    | 0.0511                                                                         | 0.0519                                                                         | 0.0488                                                                         | 0.0478                                                                         |
| <i>R</i> <sub>1</sub> ( <i>I</i> > 2 $\sigma$ ( <i>I</i> ))                | 0.0329                                                                         | 0.0315                                                                         | 0.0306                                                                         | 0.0295                                                                         |
| w <i>R</i> ( <i>F</i> <sup>2</sup> ) ( <i>I</i> > 2 $\sigma$ ( <i>I</i> )) | 0.0856                                                                         | 0.0824                                                                         | 0.0803                                                                         | 0.0777                                                                         |
| <i>R</i> <sub>1</sub> (all data)                                           | 0.0396                                                                         | 0.0371                                                                         | 0.0346                                                                         | 0.0337                                                                         |
| w <i>R</i> ( <i>F</i> <sup>2</sup> ) (all data)                            | 0.0912                                                                         | 0.0872                                                                         | 0.0830                                                                         | 0.0815                                                                         |
| Goodness-of-fit                                                            | 1.034                                                                          | 1.027                                                                          | 1.035                                                                          | 1.035                                                                          |
| CCDC deposition number                                                     | 2179705                                                                        | 2179704                                                                        | 2179703                                                                        | 2179702                                                                        |



**Table S5.** X-ray data for **DA2-BrAn H-H** at 220, 200, 180, and 160 K.

| compound formula                                                           | C <sub>28</sub> H <sub>19</sub> BrN <sub>2</sub> O <sub>4</sub> S <sub>2</sub> | C <sub>28</sub> H <sub>19</sub> BrN <sub>2</sub> O <sub>4</sub> S <sub>2</sub> | C <sub>28</sub> H <sub>19</sub> BrN <sub>2</sub> O <sub>4</sub> S <sub>2</sub> | C <sub>28</sub> H <sub>19</sub> BrN <sub>2</sub> O <sub>4</sub> S <sub>2</sub> |
|----------------------------------------------------------------------------|--------------------------------------------------------------------------------|--------------------------------------------------------------------------------|--------------------------------------------------------------------------------|--------------------------------------------------------------------------------|
| formula mass                                                               | 591.48                                                                         | 591.48                                                                         | 591.48                                                                         | 591.48                                                                         |
| crystal system                                                             | triclinic                                                                      | triclinic                                                                      | triclinic                                                                      | triclinic                                                                      |
| space group                                                                | <i>P</i> -1                                                                    | <i>P</i> -1                                                                    | <i>P</i> -1                                                                    | <i>P</i> -1                                                                    |
| <i>a</i> /Å                                                                | 7.29340(10)                                                                    | 7.27770(10)                                                                    | 7.26160(10)                                                                    | 7.24750(10)                                                                    |
| <i>b</i> /Å                                                                | 10.49260(10)                                                                   | 10.4880(2)                                                                     | 10.48750(10)                                                                   | 10.48160(10)                                                                   |
| <i>c</i> /Å                                                                | 17.1456(2)                                                                     | 17.1243(3)                                                                     | 17.0975(2)                                                                     | 17.0769(2)                                                                     |
| $\alpha$ /°                                                                | 74.0890(10)                                                                    | 74.082(2)                                                                      | 74.0600(10)                                                                    | 74.0430(10)                                                                    |
| $\beta$ /°                                                                 | 83.5460(10)                                                                    | 83.614(2)                                                                      | 83.7520(10)                                                                    | 83.8400(10)                                                                    |
| $\gamma$ /°                                                                | 86.3150(10)                                                                    | 86.328(2)                                                                      | 86.2640(10)                                                                    | 86.2470(10)                                                                    |
| <i>V</i> /Å <sup>3</sup>                                                   | 1253.06(3)                                                                     | 1248.38(4)                                                                     | 1243.73(3)                                                                     | 1239.19(3)                                                                     |
| $\rho_{\text{calc}}$ /g cm <sup>-3</sup>                                   | 1.568                                                                          | 1.574                                                                          | 1.579                                                                          | 1.585                                                                          |
| T/K                                                                        | 220.01(10)                                                                     | 200.00(10)                                                                     | 180.05(10)                                                                     | 160.05(10)                                                                     |
| <i>Z</i>                                                                   | 2                                                                              | 2                                                                              | 2                                                                              | 2                                                                              |
| radiation type                                                             | CuK $\alpha$                                                                   | CuK $\alpha$                                                                   | CuK $\alpha$                                                                   | CuK $\alpha$                                                                   |
| absorption coefficient,<br>$\mu$ /mm <sup>-1</sup>                         | 4.123                                                                          | 4.138                                                                          | 4.154                                                                          | 4.169                                                                          |
| crystal size/mm <sup>3</sup>                                               | 0.157 × 0.07 ×<br>0.049                                                        |
| no. of reflections measured                                                | 44408                                                                          | 43781                                                                          | 44948                                                                          | 45509                                                                          |
| no. of independent<br>reflections                                          | 4477                                                                           | 4453                                                                           | 5151                                                                           | 5131                                                                           |
| no. of reflections ( <i>I</i> > 2 $\sigma$ ( <i>I</i> ))                   | 4100                                                                           | 4082                                                                           | 4675                                                                           | 4722                                                                           |
| <i>R</i> <sub>int</sub>                                                    | 0.0464                                                                         | 0.0479                                                                         | 0.0477                                                                         | 0.0479                                                                         |
| <i>R</i> <sub>1</sub> ( <i>I</i> > 2 $\sigma$ ( <i>I</i> ))                | 0.0291                                                                         | 0.0293                                                                         | 0.0353                                                                         | 0.0352                                                                         |
| w <i>R</i> ( <i>F</i> <sup>2</sup> ) ( <i>I</i> > 2 $\sigma$ ( <i>I</i> )) | 0.0758                                                                         | 0.0761                                                                         | 0.0909                                                                         | 0.0908                                                                         |
| <i>R</i> <sub>1</sub> (all data)                                           | 0.0321                                                                         | 0.0324                                                                         | 0.0387                                                                         | 0.0381                                                                         |
| w <i>R</i> ( <i>F</i> <sup>2</sup> ) (all data)                            | 0.0781                                                                         | 0.0783                                                                         | 0.0931                                                                         | 0.0928                                                                         |
| Goodness-of-fit                                                            | 1.019                                                                          | 1.036                                                                          | 1.063                                                                          | 1.075                                                                          |
| CCDC deposition number                                                     | 2179701                                                                        | 2179700                                                                        | 2179699                                                                        | 2179698                                                                        |

**Table S6.** X-ray data for **DA2-BrAn H-H** at 140, 120, and 100 K.

| compound formula                              | C <sub>28</sub> H <sub>19</sub> BrN <sub>2</sub> O <sub>4</sub> S <sub>2</sub> | C <sub>28</sub> H <sub>19</sub> BrN <sub>2</sub> O <sub>4</sub> S <sub>2</sub> | C <sub>28</sub> H <sub>19</sub> BrN <sub>2</sub> O <sub>4</sub> S <sub>2</sub> |
|-----------------------------------------------|--------------------------------------------------------------------------------|--------------------------------------------------------------------------------|--------------------------------------------------------------------------------|
| formula mass                                  | 591.48                                                                         | 591.48                                                                         | 591.48                                                                         |
| crystal system                                | triclinic                                                                      | triclinic                                                                      | triclinic                                                                      |
| space group                                   | <i>P-1</i>                                                                     | <i>P-1</i>                                                                     | <i>P-1</i>                                                                     |
| a/Å                                           | 7.23490(10)                                                                    | 7.22410(10)                                                                    | 7.21410(10)                                                                    |
| b/Å                                           | 10.47620(10)                                                                   | 10.4714(2)                                                                     | 10.4674(2)                                                                     |
| c/Å                                           | 17.0549(2)                                                                     | 17.0316(3)                                                                     | 17.0117(3)                                                                     |
| α/°                                           | 74.0330(10)                                                                    | 74.0370(10)                                                                    | 74.024(2)                                                                      |
| β/°                                           | 83.9240(10)                                                                    | 83.9990(10)                                                                    | 84.049(2)                                                                      |
| γ/°                                           | 86.2310(10)                                                                    | 86.2270(10)                                                                    | 86.219(2)                                                                      |
| V/Å <sup>3</sup>                              | 1234.90(3)                                                                     | 1230.99(4)                                                                     | 1227.39(4)                                                                     |
| ρ <sub>calc</sub> /g cm <sup>-3</sup>         | 1.591                                                                          | 1.596                                                                          | 1.600                                                                          |
| T/K                                           | 140.06(10)                                                                     | 120.02(11)                                                                     | 99.97(15)                                                                      |
| Z                                             | 2                                                                              | 2                                                                              | 2                                                                              |
| radiation type                                | CuKα                                                                           | CuKα                                                                           | CuKα                                                                           |
| absorption coefficient,<br>μ/mm <sup>-1</sup> | 4.184                                                                          | 4.197                                                                          | 4.209                                                                          |
| crystal size/mm <sup>3</sup>                  | 0.157 × 0.07 ×<br>0.049                                                        | 0.157 × 0.07 ×<br>0.049                                                        | 0.157 × 0.07 ×<br>0.049                                                        |
| no. of reflections measured                   | 45013                                                                          | 42486                                                                          | 40991                                                                          |
| no. of independent<br>reflections             | 5099                                                                           | 4390                                                                           | 4375                                                                           |
| no. of reflections (I > 2σ(I))                | 4723                                                                           | 4146                                                                           | 4124                                                                           |
| R <sub>int</sub>                              | 0.0463                                                                         | 0.0475                                                                         | 0.0483                                                                         |
| R <sub>1</sub> (I > 2σ(I))                    | 0.0344                                                                         | 0.0301                                                                         | 0.0300                                                                         |
| wR(F <sup>2</sup> ) (I > 2σ(I))               | 0.0884                                                                         | 0.0797                                                                         | 0.0783                                                                         |
| R <sub>1</sub> (all data)                     | 0.0369                                                                         | 0.0319                                                                         | 0.0317                                                                         |
| wR(F <sup>2</sup> ) (all data)                | 0.0899                                                                         | 0.0809                                                                         | 0.0793                                                                         |
| Goodness-of-fit                               | 1.091                                                                          | 1.050                                                                          | 1.046                                                                          |
| CCDC deposition number                        | 2179697                                                                        | 2179696                                                                        | 2179695                                                                        |

**Table S7.** X-ray data for **DA2-BrAn CA Nonsolvate** at 300, 280, 260, and 240 K.

| compound formula                                                           | C <sub>28</sub> H <sub>19</sub> BrN <sub>2</sub> O <sub>4</sub> S <sub>2</sub> | C <sub>28</sub> H <sub>19</sub> BrN <sub>2</sub> O <sub>4</sub> S <sub>2</sub> | C <sub>28</sub> H <sub>19</sub> BrN <sub>2</sub> O <sub>4</sub> S <sub>2</sub> | C <sub>28</sub> H <sub>19</sub> BrN <sub>2</sub> O <sub>4</sub> S <sub>2</sub> |
|----------------------------------------------------------------------------|--------------------------------------------------------------------------------|--------------------------------------------------------------------------------|--------------------------------------------------------------------------------|--------------------------------------------------------------------------------|
| formula mass                                                               | 591.48                                                                         | 591.48                                                                         | 591.48                                                                         | 591.48                                                                         |
| crystal system                                                             | monoclinic                                                                     | monoclinic                                                                     | monoclinic                                                                     | monoclinic                                                                     |
| space group                                                                | <i>P2<sub>1</sub>/n</i>                                                        | <i>P2<sub>1</sub>/n</i>                                                        | <i>P2<sub>1</sub>/n</i>                                                        | <i>P2<sub>1</sub>/n</i>                                                        |
| <i>a</i> /Å                                                                | 12.8827(2)                                                                     | 12.8422(2)                                                                     | 12.8024(2)                                                                     | 12.7684(2)                                                                     |
| <i>b</i> /Å                                                                | 23.1663(3)                                                                     | 23.1663(3)                                                                     | 23.1655(2)                                                                     | 23.1636(3)                                                                     |
| <i>c</i> /Å                                                                | 8.5489(2)                                                                      | 8.53950(10)                                                                    | 8.53020(10)                                                                    | 8.52030(10)                                                                    |
| $\alpha$ /°                                                                | 90                                                                             | 90                                                                             | 90                                                                             | 90                                                                             |
| $\beta$ /°                                                                 | 102.983(2)                                                                     | 102.991(2)                                                                     | 102.9910(10)                                                                   | 102.974(2)                                                                     |
| $\gamma$ /°                                                                | 90                                                                             | 90                                                                             | 90                                                                             | 90                                                                             |
| <i>V</i> /Å <sup>3</sup>                                                   | 2486.15(8)                                                                     | 2475.53(6)                                                                     | 2465.08(5)                                                                     | 2455.65(6)                                                                     |
| $\rho_{\text{calc}}$ /g cm <sup>-3</sup>                                   | 1.580                                                                          | 1.587                                                                          | 1.594                                                                          | 1.600                                                                          |
| T/K                                                                        | 300.06(10)                                                                     | 280.06(10)                                                                     | 260.05(10)                                                                     | 240.05(10)                                                                     |
| <i>Z</i>                                                                   | 4                                                                              | 4                                                                              | 4                                                                              | 4                                                                              |
| radiation type                                                             | CuK $\alpha$                                                                   | CuK $\alpha$                                                                   | CuK $\alpha$                                                                   | CuK $\alpha$                                                                   |
| absorption coefficient,<br>$\mu$ /mm <sup>-1</sup>                         | 4.156                                                                          | 4.174                                                                          | 4.192                                                                          | 4.208                                                                          |
| crystal size/mm <sup>3</sup>                                               | 0.187 × 0.099 ×<br>0.044                                                       |
| no. of reflections measured                                                | 33327                                                                          | 32756                                                                          | 34642                                                                          | 34959                                                                          |
| no. of independent reflections                                             | 5028                                                                           | 5003                                                                           | 5033                                                                           | 5040                                                                           |
| no. of reflections ( <i>I</i> > 2 $\sigma$ ( <i>I</i> ))                   | 3978                                                                           | 4111                                                                           | 4246                                                                           | 4373                                                                           |
| <i>R</i> <sub>int</sub>                                                    | 0.0760                                                                         | 0.0736                                                                         | 0.0689                                                                         | 0.0691                                                                         |
| <i>R</i> <sub>1</sub> ( <i>I</i> > 2 $\sigma$ ( <i>I</i> ))                | 0.0457                                                                         | 0.0464                                                                         | 0.0445                                                                         | 0.0450                                                                         |
| w <i>R</i> ( <i>F</i> <sup>2</sup> ) ( <i>I</i> > 2 $\sigma$ ( <i>I</i> )) | 0.1088                                                                         | 0.1062                                                                         | 0.1022                                                                         | 0.1019                                                                         |
| <i>R</i> <sub>1</sub> (all data)                                           | 0.0593                                                                         | 0.0575                                                                         | 0.0537                                                                         | 0.0526                                                                         |
| w <i>R</i> ( <i>F</i> <sup>2</sup> ) (all data)                            | 0.1167                                                                         | 0.1123                                                                         | 0.1076                                                                         | 0.1059                                                                         |
| Goodness-of-fit                                                            | 1.049                                                                          | 1.048                                                                          | 1.059                                                                          | 1.055                                                                          |
| CCDC deposition number                                                     | 2179683                                                                        | 2179682                                                                        | 2179681                                                                        | 2179680                                                                        |

**Table S8.** X-ray data for **DA2-BrAn CA Nonsolvate** at 220, 200, 180, and 160 K.

| compound formula                                                           | C <sub>28</sub> H <sub>19</sub> BrN <sub>2</sub> O <sub>4</sub> S <sub>2</sub> | C <sub>28</sub> H <sub>19</sub> BrN <sub>2</sub> O <sub>4</sub> S <sub>2</sub> | C <sub>28</sub> H <sub>19</sub> BrN <sub>2</sub> O <sub>4</sub> S <sub>2</sub> | C <sub>28</sub> H <sub>19</sub> BrN <sub>2</sub> O <sub>4</sub> S <sub>2</sub> |
|----------------------------------------------------------------------------|--------------------------------------------------------------------------------|--------------------------------------------------------------------------------|--------------------------------------------------------------------------------|--------------------------------------------------------------------------------|
| formula mass                                                               | 591.48                                                                         | 591.48                                                                         | 591.48                                                                         | 591.48                                                                         |
| crystal system                                                             | monoclinic                                                                     | monoclinic                                                                     | monoclinic                                                                     | monoclinic                                                                     |
| space group                                                                | <i>P2<sub>1</sub>/n</i>                                                        | <i>P2<sub>1</sub>/n</i>                                                        | <i>P2<sub>1</sub>/n</i>                                                        | <i>P2<sub>1</sub>/n</i>                                                        |
| <i>a</i> /Å                                                                | 12.7367(2)                                                                     | 12.7092(2)                                                                     | 12.68870(10)                                                                   | 12.6761(2)                                                                     |
| <i>b</i> /Å                                                                | 23.1582(3)                                                                     | 23.1518(3)                                                                     | 23.1336(2)                                                                     | 23.1148(3)                                                                     |
| <i>c</i> /Å                                                                | 8.51220(10)                                                                    | 8.50430(10)                                                                    | 8.49540(10)                                                                    | 8.48800(10)                                                                    |
| $\alpha$ /°                                                                | 90                                                                             | 90                                                                             | 90                                                                             | 90                                                                             |
| $\beta$ /°                                                                 | 102.958(2)                                                                     | 102.9460(10)                                                                   | 102.9400(10)                                                                   | 102.9490(10)                                                                   |
| $\gamma$ /°                                                                | 90                                                                             | 90                                                                             | 90                                                                             | 90                                                                             |
| <i>V</i> /Å <sup>3</sup>                                                   | 2446.81(6)                                                                     | 2438.71(6)                                                                     | 2430.37(4)                                                                     | 2423.78(6)                                                                     |
| $\rho_{\text{calc}}$ /g cm <sup>-3</sup>                                   | 1.606                                                                          | 1.611                                                                          | 1.617                                                                          | 1.621                                                                          |
| T/K                                                                        | 220.05(10)                                                                     | 200.05(10)                                                                     | 180.05(10)                                                                     | 160.04(10)                                                                     |
| <i>Z</i>                                                                   | 4                                                                              | 4                                                                              | 4                                                                              | 4                                                                              |
| radiation type                                                             | CuK $\alpha$                                                                   | CuK $\alpha$                                                                   | CuK $\alpha$                                                                   | CuK $\alpha$                                                                   |
| absorption coefficient,<br>$\mu$ /mm <sup>-1</sup>                         | 4.223                                                                          | 4.237                                                                          | 4.251                                                                          | 4.263                                                                          |
| crystal size/mm <sup>3</sup>                                               | 0.187 × 0.099 ×<br>0.044                                                       |
| no. of reflections measured                                                | 35645                                                                          | 37025                                                                          | 40373                                                                          | 46027                                                                          |
| no. of independent<br>reflections                                          | 5048                                                                           | 5049                                                                           | 5050                                                                           | 5012                                                                           |
| no. of reflections ( <i>I</i> > 2 $\sigma$ ( <i>I</i> ))                   | 4464                                                                           | 4562                                                                           | 4650                                                                           | 4684                                                                           |
| <i>R</i> <sub>int</sub>                                                    | 0.0712                                                                         | 0.0735                                                                         | 0.0686                                                                         | 0.0634                                                                         |
| <i>R</i> <sub>1</sub> ( <i>I</i> > 2 $\sigma$ ( <i>I</i> ))                | 0.0443                                                                         | 0.0449                                                                         | 0.0426                                                                         | 0.0414                                                                         |
| w <i>R</i> ( <i>F</i> <sup>2</sup> ) ( <i>I</i> > 2 $\sigma$ ( <i>I</i> )) | 0.1009                                                                         | 0.0993                                                                         | 0.0947                                                                         | 0.0888                                                                         |
| <i>R</i> <sub>1</sub> (all data)                                           | 0.0500                                                                         | 0.0493                                                                         | 0.0464                                                                         | 0.0442                                                                         |
| w <i>R</i> ( <i>F</i> <sup>2</sup> ) (all data)                            | 0.1035                                                                         | 0.1014                                                                         | 0.0967                                                                         | 0.0902                                                                         |
| Goodness-of-fit                                                            | 1.080                                                                          | 1.087                                                                          | 1.116                                                                          | 1.135                                                                          |
| CCDC deposition number                                                     | 2179679                                                                        | 2179678                                                                        | 2179677                                                                        | 2179676                                                                        |

**Table S9.** X-ray data for **DA2-BrAn CA Nonsolvate** at 140, 120, and 100 K.

| compound formula                              | C <sub>28</sub> H <sub>19</sub> BrN <sub>2</sub> O <sub>4</sub> S <sub>2</sub> | C <sub>28</sub> H <sub>19</sub> BrN <sub>2</sub> O <sub>4</sub> S <sub>2</sub> | C <sub>28</sub> H <sub>19</sub> BrN <sub>2</sub> O <sub>4</sub> S <sub>2</sub> |
|-----------------------------------------------|--------------------------------------------------------------------------------|--------------------------------------------------------------------------------|--------------------------------------------------------------------------------|
| formula mass                                  | 591.48                                                                         | 591.48                                                                         | 591.48                                                                         |
| crystal system                                | monoclinic                                                                     | monoclinic                                                                     | monoclinic                                                                     |
| space group                                   | <i>P2<sub>1</sub>/n</i>                                                        | <i>P2<sub>1</sub>/n</i>                                                        | <i>P2<sub>1</sub>/n</i>                                                        |
| a/Å                                           | 12.66500(10)                                                                   | 12.65620(10)                                                                   | 12.6484(2)                                                                     |
| b/Å                                           | 23.0937(2)                                                                     | 23.0704(2)                                                                     | 23.0505(2)                                                                     |
| c/Å                                           | 8.48130(10)                                                                    | 8.47410(10)                                                                    | 8.46750(10)                                                                    |
| α/°                                           | 90                                                                             | 90                                                                             | 90                                                                             |
| β/°                                           | 102.9490(10)                                                                   | 102.9600(10)                                                                   | 102.9730(10)                                                                   |
| γ/°                                           | 90                                                                             | 90                                                                             | 90                                                                             |
| V/Å <sup>3</sup>                              | 2417.54(4)                                                                     | 2411.27(4)                                                                     | 2405.70(5)                                                                     |
| ρ <sub>calc</sub> /g cm <sup>-3</sup>         | 1.625                                                                          | 1.629                                                                          | 1.633                                                                          |
| T/K                                           | 140.05(10)                                                                     | 120.02(15)                                                                     | 100.01(10)                                                                     |
| Z                                             | 4                                                                              | 4                                                                              | 4                                                                              |
| radiation type                                | CuKα                                                                           | CuKα                                                                           | CuKα                                                                           |
| absorption coefficient,<br>μ/mm <sup>-1</sup> | 4.274                                                                          | 4.285                                                                          | 4.295                                                                          |
| crystal size/mm <sup>3</sup>                  | 0.187 × 0.099 ×<br>0.044                                                       | 0.187 × 0.099 ×<br>0.044                                                       | 0.187 × 0.099 ×<br>0.044                                                       |
| no. of reflections measured                   | 44489                                                                          | 48441                                                                          | 49733                                                                          |
| no. of independent<br>reflections             | 4986                                                                           | 4988                                                                           | 4989                                                                           |
| no. of reflections (I > 2σ(I))                | 4702                                                                           | 4760                                                                           | 4759                                                                           |
| R <sub>int</sub>                              | 0.0562                                                                         | 0.0557                                                                         | 0.0551                                                                         |
| R <sub>1</sub> (I > 2σ(I))                    | 0.0410                                                                         | 0.0409                                                                         | 0.0409                                                                         |
| wR(F <sup>2</sup> ) (I > 2σ(I))               | 0.0858                                                                         | 0.0835                                                                         | 0.0841                                                                         |
| R <sub>1</sub> (all data)                     | 0.0434                                                                         | 0.0429                                                                         | 0.0428                                                                         |
| wR(F <sup>2</sup> ) (all data)                | 0.0869                                                                         | 0.0844                                                                         | 0.0850                                                                         |
| Goodness-of-fit                               | 1.142                                                                          | 1.154                                                                          | 1.168                                                                          |
| CCDC deposition number                        | 2179675                                                                        | 2179674                                                                        | 2179673                                                                        |

**Table S10.** X-ray data for **DA2-BrAn H-T CA Solvate** at 300, 280, 260, and 240 K.

| compound formula                                                           | C <sub>29</sub> H <sub>21</sub> BrCl <sub>2</sub> N <sub>2</sub><br>O <sub>4</sub> S <sub>2</sub> | C <sub>29</sub> H <sub>21</sub> BrCl <sub>2</sub> N <sub>2</sub><br>O <sub>4</sub> S <sub>2</sub> | C <sub>29</sub> H <sub>21</sub> BrCl <sub>2</sub> N <sub>2</sub><br>O <sub>4</sub> S <sub>2</sub> | C <sub>29</sub> H <sub>21</sub> BrCl <sub>2</sub> N <sub>2</sub><br>O <sub>4</sub> S <sub>2</sub> |
|----------------------------------------------------------------------------|---------------------------------------------------------------------------------------------------|---------------------------------------------------------------------------------------------------|---------------------------------------------------------------------------------------------------|---------------------------------------------------------------------------------------------------|
| formula mass                                                               | 676.41                                                                                            | 676.41                                                                                            | 676.41                                                                                            | 676.41                                                                                            |
| crystal system                                                             | triclinic                                                                                         | triclinic                                                                                         | triclinic                                                                                         | triclinic                                                                                         |
| space group                                                                | <i>P</i> -1                                                                                       | <i>P</i> -1                                                                                       | <i>P</i> -1                                                                                       | <i>P</i> -1                                                                                       |
| <i>a</i> /Å                                                                | 8.30080(10)                                                                                       | 8.28710(10)                                                                                       | 8.27430(10)                                                                                       | 8.26160(10)                                                                                       |
| <i>b</i> /Å                                                                | 12.6587(2)                                                                                        | 12.6405(2)                                                                                        | 12.6240(2)                                                                                        | 12.6082(2)                                                                                        |
| <i>c</i> /Å                                                                | 14.6123(3)                                                                                        | 14.5859(3)                                                                                        | 14.5612(3)                                                                                        | 14.5375(2)                                                                                        |
| $\alpha$ /°                                                                | 110.224(2)                                                                                        | 110.159(2)                                                                                        | 110.093(2)                                                                                        | 110.024(2)                                                                                        |
| $\beta$ /°                                                                 | 90.1780(10)                                                                                       | 90.2630(10)                                                                                       | 90.3500(10)                                                                                       | 90.4470(10)                                                                                       |
| $\gamma$ /°                                                                | 100.2070(10)                                                                                      | 100.1920(10)                                                                                      | 100.1880(10)                                                                                      | 100.1750(10)                                                                                      |
| <i>V</i> /Å <sup>3</sup>                                                   | 1414.51(4)                                                                                        | 1408.12(4)                                                                                        | 1402.21(4)                                                                                        | 1396.54(4)                                                                                        |
| $\rho_{\text{calc}}$ /g cm <sup>-3</sup>                                   | 1.588                                                                                             | 1.595                                                                                             | 1.602                                                                                             | 1.609                                                                                             |
| T/K                                                                        | 300.06(10)                                                                                        | 280.05(10)                                                                                        | 260.05(10)                                                                                        | 240.05(10)                                                                                        |
| <i>Z</i>                                                                   | 2                                                                                                 | 2                                                                                                 | 2                                                                                                 | 2                                                                                                 |
| radiation type                                                             | CuK $\alpha$                                                                                      | CuK $\alpha$                                                                                      | CuK $\alpha$                                                                                      | CuK $\alpha$                                                                                      |
| absorption coefficient,<br>$\mu$ /mm <sup>-1</sup>                         | 5.430                                                                                             | 5.454                                                                                             | 5.477                                                                                             | 5.500                                                                                             |
| crystal size/mm <sup>3</sup>                                               | 0.22 × 0.131 ×<br>0.098                                                                           |
| no. of reflections measured                                                | 25740                                                                                             | 26444                                                                                             | 24644                                                                                             | 25394                                                                                             |
| no. of independent<br>reflections                                          | 5794                                                                                              | 5780                                                                                              | 5746                                                                                              | 5723                                                                                              |
| no. of reflections ( <i>I</i> > 2 $\sigma$ ( <i>I</i> ))                   | 4528                                                                                              | 4658                                                                                              | 4721                                                                                              | 4825                                                                                              |
| <i>R</i> <sub>int</sub>                                                    | 0.0627                                                                                            | 0.0618                                                                                            | 0.0581                                                                                            | 0.0590                                                                                            |
| <i>R</i> <sub>1</sub> ( <i>I</i> > 2 $\sigma$ ( <i>I</i> ))                | 0.0451                                                                                            | 0.0438                                                                                            | 0.0419                                                                                            | 0.0408                                                                                            |
| w <i>R</i> ( <i>F</i> <sup>2</sup> ) ( <i>I</i> > 2 $\sigma$ ( <i>I</i> )) | 0.1139                                                                                            | 0.1105                                                                                            | 0.1047                                                                                            | 0.1031                                                                                            |
| <i>R</i> <sub>1</sub> (all data)                                           | 0.0575                                                                                            | 0.0544                                                                                            | 0.0517                                                                                            | 0.0482                                                                                            |
| w <i>R</i> ( <i>F</i> <sup>2</sup> ) (all data)                            | 0.1253                                                                                            | 0.1209                                                                                            | 0.1141                                                                                            | 0.1096                                                                                            |
| Goodness-of-fit                                                            | 1.060                                                                                             | 1.038                                                                                             | 1.031                                                                                             | 1.054                                                                                             |
| CCDC deposition number                                                     | 2179694                                                                                           | 2179693                                                                                           | 2179692                                                                                           | 2179691                                                                                           |

**Table S11.** X-ray data for **DA2-BrAn H-T CA Solvate** at 220, 200, 180, and 160 K.

| compound formula                                                           | C <sub>29</sub> H <sub>21</sub> BrCl <sub>2</sub> N <sub>2</sub><br>O <sub>4</sub> S <sub>2</sub> | C <sub>29</sub> H <sub>21</sub> BrCl <sub>2</sub> N <sub>2</sub><br>O <sub>4</sub> S <sub>2</sub> | C <sub>29</sub> H <sub>21</sub> BrCl <sub>2</sub> N <sub>2</sub><br>O <sub>4</sub> S <sub>2</sub> | C <sub>29</sub> H <sub>21</sub> BrCl <sub>2</sub> N <sub>2</sub><br>O <sub>4</sub> S <sub>2</sub> |
|----------------------------------------------------------------------------|---------------------------------------------------------------------------------------------------|---------------------------------------------------------------------------------------------------|---------------------------------------------------------------------------------------------------|---------------------------------------------------------------------------------------------------|
| formula mass                                                               | 676.41                                                                                            | 676.41                                                                                            | 676.41                                                                                            | 676.41                                                                                            |
| crystal system                                                             | triclinic                                                                                         | triclinic                                                                                         | triclinic                                                                                         | triclinic                                                                                         |
| space group                                                                | <i>P</i> -1                                                                                       | <i>P</i> -1                                                                                       | <i>P</i> -1                                                                                       | <i>P</i> -1                                                                                       |
| <i>a</i> /Å                                                                | 8.24900(10)                                                                                       | 8.23820(10)                                                                                       | 8.22720(10)                                                                                       | 8.21730(10)                                                                                       |
| <i>b</i> /Å                                                                | 12.5938(2)                                                                                        | 12.5766(2)                                                                                        | 12.5614(2)                                                                                        | 12.5465(2)                                                                                        |
| <i>c</i> /Å                                                                | 14.5158(2)                                                                                        | 14.4942(2)                                                                                        | 14.4730(2)                                                                                        | 14.4534(2)                                                                                        |
| $\alpha$ /°                                                                | 109.9650(10)                                                                                      | 109.9020(10)                                                                                      | 109.8260(10)                                                                                      | 109.7610(10)                                                                                      |
| $\beta$ /°                                                                 | 90.5380(10)                                                                                       | 90.6370(10)                                                                                       | 90.7290(10)                                                                                       | 90.8080(10)                                                                                       |
| $\gamma$ /°                                                                | 100.1680(10)                                                                                      | 100.1610(10)                                                                                      | 100.1510(10)                                                                                      | 100.1480(10)                                                                                      |
| <i>V</i> /Å <sup>3</sup>                                                   | 1391.14(4)                                                                                        | 1385.77(3)                                                                                        | 1380.78(3)                                                                                        | 1376.06(3)                                                                                        |
| $\rho_{\text{calc}}$ /g cm <sup>-3</sup>                                   | 1.615                                                                                             | 1.621                                                                                             | 1.627                                                                                             | 1.632                                                                                             |
| T/K                                                                        | 220.06(10)                                                                                        | 200.05(10)                                                                                        | 180.05(10)                                                                                        | 160.06(10)                                                                                        |
| <i>Z</i>                                                                   | 2                                                                                                 | 2                                                                                                 | 2                                                                                                 | 2                                                                                                 |
| radiation type                                                             | CuK $\alpha$                                                                                      | CuK $\alpha$                                                                                      | CuK $\alpha$                                                                                      | CuK $\alpha$                                                                                      |
| absorption coefficient,<br>$\mu$ /mm <sup>-1</sup>                         | 5.521                                                                                             | 5.542                                                                                             | 5.562                                                                                             | 5.582                                                                                             |
| crystal size/mm <sup>3</sup>                                               | 0.22 × 0.131 ×<br>0.098                                                                           |
| no. of reflections measured                                                | 25784                                                                                             | 26210                                                                                             | 24300                                                                                             | 24568                                                                                             |
| no. of independent<br>reflections                                          | 5700                                                                                              | 5690                                                                                              | 5623                                                                                              | 5615                                                                                              |
| no. of reflections ( <i>I</i> > 2 $\sigma$ ( <i>I</i> ))                   | 4876                                                                                              | 4996                                                                                              | 5025                                                                                              | 5055                                                                                              |
| <i>R</i> <sub>int</sub>                                                    | 0.0572                                                                                            | 0.0557                                                                                            | 0.0513                                                                                            | 0.0514                                                                                            |
| <i>R</i> <sub>1</sub> ( <i>I</i> > 2 $\sigma$ ( <i>I</i> ))                | 0.0387                                                                                            | 0.0369                                                                                            | 0.0365                                                                                            | 0.0352                                                                                            |
| w <i>R</i> ( <i>F</i> <sup>2</sup> ) ( <i>I</i> > 2 $\sigma$ ( <i>I</i> )) | 0.0987                                                                                            | 0.0934                                                                                            | 0.0912                                                                                            | 0.0883                                                                                            |
| <i>R</i> <sub>1</sub> (all data)                                           | 0.0453                                                                                            | 0.0422                                                                                            | 0.0410                                                                                            | 0.0392                                                                                            |
| w <i>R</i> ( <i>F</i> <sup>2</sup> ) (all data)                            | 0.1042                                                                                            | 0.0981                                                                                            | 0.0957                                                                                            | 0.0922                                                                                            |
| Goodness-of-fit                                                            | 1.061                                                                                             | 1.051                                                                                             | 1.057                                                                                             | 1.055                                                                                             |
| CCDC deposition number                                                     | 2179690                                                                                           | 2179689                                                                                           | 2179688                                                                                           | 2179687                                                                                           |

**Table S12.** X-ray data for **DA2-BrAn H-T CA Solvate** at 140, 120, and 100 K.

| compound formula                                                           | C <sub>29</sub> H <sub>21</sub> BrCl <sub>2</sub> N <sub>2</sub><br>O <sub>4</sub> S <sub>2</sub> | C <sub>29</sub> H <sub>21</sub> BrCl <sub>2</sub> N <sub>2</sub><br>O <sub>4</sub> S <sub>2</sub> | C <sub>29</sub> H <sub>21</sub> BrCl <sub>2</sub> N <sub>2</sub><br>O <sub>4</sub> S <sub>2</sub> |
|----------------------------------------------------------------------------|---------------------------------------------------------------------------------------------------|---------------------------------------------------------------------------------------------------|---------------------------------------------------------------------------------------------------|
| formula mass                                                               | 676.41                                                                                            | 676.41                                                                                            | 676.41                                                                                            |
| crystal system                                                             | triclinic                                                                                         | triclinic                                                                                         | triclinic                                                                                         |
| space group                                                                | <i>P</i> -1                                                                                       | <i>P</i> -1                                                                                       | <i>P</i> -1                                                                                       |
| <i>a</i> /Å                                                                | 8.20890(10)                                                                                       | 8.20170(10)                                                                                       | 8.19530(10)                                                                                       |
| <i>b</i> /Å                                                                | 12.5322(2)                                                                                        | 12.5179(2)                                                                                        | 12.5048(2)                                                                                        |
| <i>c</i> /Å                                                                | 14.4357(2)                                                                                        | 14.4178(2)                                                                                        | 14.4006(2)                                                                                        |
| $\alpha$ /°                                                                | 109.7000(10)                                                                                      | 109.6400(10)                                                                                      | 109.5920(10)                                                                                      |
| $\beta$ /°                                                                 | 90.8830(10)                                                                                       | 90.9480(10)                                                                                       | 91.0160(10)                                                                                       |
| $\gamma$ /°                                                                | 100.1350(10)                                                                                      | 100.1250(10)                                                                                      | 100.1160(10)                                                                                      |
| <i>V</i> /Å <sup>3</sup>                                                   | 1371.86(3)                                                                                        | 1367.85(3)                                                                                        | 1364.05(3)                                                                                        |
| $\rho_{\text{calc}}$ /g cm <sup>-3</sup>                                   | 1.637                                                                                             | 1.642                                                                                             | 1.647                                                                                             |
| T/K                                                                        | 140.05(10)                                                                                        | 120.05(10)                                                                                        | 99.99(16)                                                                                         |
| <i>Z</i>                                                                   | 2                                                                                                 | 2                                                                                                 | 2                                                                                                 |
| radiation type                                                             | CuK $\alpha$                                                                                      | CuK $\alpha$                                                                                      | CuK $\alpha$                                                                                      |
| absorption coefficient,<br>$\mu$ /mm <sup>-1</sup>                         | 5.599                                                                                             | 5.615                                                                                             | 5.631                                                                                             |
| crystal size/mm <sup>3</sup>                                               | 0.22 × 0.131 ×<br>0.098                                                                           | 0.22 × 0.131 ×<br>0.098                                                                           | 0.22 × 0.131 ×<br>0.098                                                                           |
| no. of reflections measured                                                | 25006                                                                                             | 25222                                                                                             | 25558                                                                                             |
| no. of independent<br>reflections                                          | 5641                                                                                              | 5619                                                                                              | 5627                                                                                              |
| no. of reflections ( <i>I</i> > 2 $\sigma$ ( <i>I</i> ))                   | 5137                                                                                              | 5185                                                                                              | 5241                                                                                              |
| <i>R</i> <sub>int</sub>                                                    | 0.0507                                                                                            | 0.0504                                                                                            | 0.0489                                                                                            |
| <i>R</i> <sub>1</sub> ( <i>I</i> > 2 $\sigma$ ( <i>I</i> ))                | 0.0340                                                                                            | 0.0338                                                                                            | 0.0336                                                                                            |
| w <i>R</i> ( <i>F</i> <sup>2</sup> ) ( <i>I</i> > 2 $\sigma$ ( <i>I</i> )) | 0.0836                                                                                            | 0.0844                                                                                            | 0.0856                                                                                            |
| <i>R</i> <sub>1</sub> (all data)                                           | 0.0374                                                                                            | 0.0366                                                                                            | 0.0364                                                                                            |
| w <i>R</i> ( <i>F</i> <sup>2</sup> ) (all data)                            | 0.0870                                                                                            | 0.0868                                                                                            | 0.0888                                                                                            |
| Goodness-of-fit                                                            | 1.036                                                                                             | 1.061                                                                                             | 1.080                                                                                             |
| CCDC deposition number                                                     | 2179686                                                                                           | 2179685                                                                                           | 2179684                                                                                           |



**Table S13.** X-ray data for **DA2-BrAn CAs** (non-solvate and solvate) obtained from recrystallization of the H-H reacted product at 100 K.

| compound formula                              | C <sub>28</sub> H <sub>19</sub> BrN <sub>2</sub> O <sub>4</sub> S <sub>2</sub> | C <sub>29</sub> H <sub>21</sub> BrCl <sub>2</sub> N <sub>2</sub> O <sub>4</sub> S <sub>2</sub> |
|-----------------------------------------------|--------------------------------------------------------------------------------|------------------------------------------------------------------------------------------------|
| formula mass                                  | 591.48                                                                         | 676.41                                                                                         |
| crystal system                                | Monoclinic                                                                     | Triclinic                                                                                      |
| space group                                   | <i>P2<sub>1</sub>/c</i>                                                        | <i>P-1</i>                                                                                     |
| a/Å                                           | 12.6744(2)                                                                     | 8.20200(10)                                                                                    |
| b/Å                                           | 23.0269(3)                                                                     | 12.5063(2)                                                                                     |
| c/Å                                           | 8.48040(10)                                                                    | 14.4204(2)                                                                                     |
| α/°                                           | 90                                                                             | 109.6660(10)                                                                                   |
| β/°                                           | 103.198(2)                                                                     | 90.9300(10)                                                                                    |
| γ/°                                           | 90                                                                             | 100.1330(10)                                                                                   |
| V/Å <sup>3</sup>                              | 2409.65(6)                                                                     | 1366.64(3)                                                                                     |
| ρ <sub>calc</sub> /g cm <sup>-3</sup>         | 1.630                                                                          | 1.644                                                                                          |
| T/K                                           | 100.00(10)                                                                     | 100.00(10)                                                                                     |
| Z                                             | 4                                                                              | 2                                                                                              |
| radiation type                                | CuKα                                                                           | CuKα                                                                                           |
| absorption coefficient,<br>μ/mm <sup>-1</sup> | 4.288                                                                          | 5.620                                                                                          |
| crystal size/mm <sup>3</sup>                  | 0.267 x 0.149 x<br>0.039                                                       | 0.255 x 0.09 x 0.037                                                                           |
| no. of reflections measured                   | 26084                                                                          | 28767                                                                                          |
| no. of independent<br>reflections             | 4944                                                                           | 5525                                                                                           |
| no. of reflections (I > 2σ(I))                | 4469                                                                           | 5031                                                                                           |
| R <sub>int</sub>                              | 0.0638                                                                         | 0.0668                                                                                         |
| R <sub>1</sub> (I > 2σ(I))                    | 0.0624                                                                         | 0.0416                                                                                         |
| wR(F <sup>2</sup> ) (I > 2σ(I))               | 0.1329                                                                         | 0.1073                                                                                         |
| R <sub>1</sub> (all data)                     | 0.0681                                                                         | 0.0450                                                                                         |
| wR(F <sup>2</sup> ) (all data)                | 0.1360                                                                         | 0.1096                                                                                         |
| Goodness-of-fit                               | 1.108                                                                          | 1.057                                                                                          |
| CCDC deposition number                        | 2179671                                                                        | 2179672                                                                                        |

### 3. Thermal Expansion Data and Intermolecular Interaction Distances

The TE coefficients were calculated using the PASCAL program.<sup>7</sup> The unit cell parameters from the crystallographic data sets collected from 100-300 K were used for the TE calculations.

**Table S14.** TE coefficients for the crystals. Errors are denoted in parentheses and approximate crystallographic axes are denoted in brackets.

| Crystal                                | $\alpha_{x_1}$ (MK <sup>-1</sup> )<br>[axis] | $\alpha_{x_2}$ (MK <sup>-1</sup> )<br>[axis] | $\alpha_{x_3}$ (MK <sup>-1</sup> )<br>[axis] | $\alpha_V$ (MK <sup>-1</sup> ) |
|----------------------------------------|----------------------------------------------|----------------------------------------------|----------------------------------------------|--------------------------------|
| <b>DA2-BrAn H-T</b>                    | 8 (1)<br>[3 0 -1]                            | 56 (2)<br>[3 0 4]                            | 113 (3)<br>[0 1 0]                           | 179 (5)                        |
| <b>DA2-BrAn H-H</b>                    | 17 (1)<br>[2 5 -1]                           | 38 (1)<br>[-4 1 2]                           | 130 (3)<br>[5 -1 2]                          | 188 (3)                        |
| <b>DA2-BrAn H-T<br/>CA Non-solvate</b> | 28 (3)<br>[1 0 -5]                           | 47 (1)<br>[0 -1 0]                           | 90 (8)<br>[4 0 3]                            | 168 (6)                        |
| <b>DA2-BrAn H-T<br/>CA Solvate</b>     | 16 (1)<br>[-1 1 1]                           | 58 (2)<br>[1 1 0]                            | 109 (3)<br>[4 -1 3]                          | 186 (5)                        |

**Table S15.** Intermolecular interaction distances.

| Crystal                                | C-H...O (Å)<br>300 K | C-H...O (Å)<br>100 K | $\Delta$ (Å) |
|----------------------------------------|----------------------|----------------------|--------------|
| <b>DA2-BrAn H-T</b>                    | 3.378                | 3.339                | 0.039        |
|                                        | 3.436                | 3.357                | 0.079        |
|                                        | 3.288                | 3.224                | 0.064        |
|                                        | 3.373                | 3.318                | 0.055        |
|                                        | 3.638                | 3.593                | 0.045        |
|                                        |                      |                      | Avg: 0.056   |
| <b>DA2-BrAn H-H</b>                    | 3.609                | 3.517                | 0.092        |
|                                        | 3.359                | 3.284                | 0.075        |
|                                        | 3.344                | 3.301                | 0.043        |
|                                        | 3.450                | 3.375                | 0.075        |
|                                        | 3.744                | 3.616                | 0.128        |
|                                        | 3.553                | 3.504                | 0.049        |
|                                        | 3.336                | 3.272                | 0.064        |
|                                        |                      |                      | Avg: 0.075   |
| <b>DA2-BrAn H-T<br/>CA Non-solvate</b> | 3.399                | 3.265                | 0.134        |
|                                        | 3.373                | 3.252                | 0.121        |
|                                        | 3.197                | 3.140                | 0.057        |
|                                        | 3.063                | 3.012                | 0.051        |
|                                        | 3.410                | 3.323                | 0.087        |
|                                        | 3.596                | 3.550                | 0.046        |
|                                        | 3.317                | 3.245                | 0.072        |
|                                        |                      |                      | Avg: 0.081   |

|                                    |       |       |            |
|------------------------------------|-------|-------|------------|
| <b>DA2-BrAn H-T<br/>CA Solvate</b> | 3.535 | 3.390 | 0.145      |
|                                    | 3.562 | 3.468 | 0.094      |
|                                    | 3.771 | 3.602 | 0.169      |
|                                    | 3.203 | 3.211 | -0.008     |
|                                    | 3.473 | 3.379 | 0.094      |
|                                    |       |       | Avg: 0.099 |

| Crystal                                | $\pi \cdots \pi$ (Å)<br>300 K | $\pi \cdots \pi$ (Å)<br>100 K | $\Delta$ (Å) |
|----------------------------------------|-------------------------------|-------------------------------|--------------|
| <b>DA2-BrAn H-T</b>                    | 3.453                         | 3.373                         | 0.080        |
|                                        | 3.476                         | 3.393                         | 0.084        |
|                                        | 3.481                         | 3.398                         | 0.082        |
|                                        | 3.430                         | 3.347                         | 0.083        |
|                                        |                               |                               | Avg: 0.082   |
| <b>DA2-BrAn H-H</b>                    | 3.940                         | 3.777                         | 0.163        |
|                                        | 3.607                         | 3.490                         | 0.117        |
|                                        | 3.467                         | 3.389                         | 0.078        |
|                                        | 3.440                         | 3.378                         | 0.062        |
|                                        | 3.388                         | 3.319                         | 0.069        |
|                                        | 3.549                         | 3.481                         | 0.068        |
|                                        | 3.567                         | 3.505                         | 0.062        |
|                                        | 3.463                         | 3.371                         | 0.092        |
|                                        | 3.412                         | 3.342                         | 0.070        |
| 3.454                                  | 3.389                         | 0.065                         |              |
| 3.472                                  | 3.398                         | 0.074                         |              |
|                                        |                               |                               | Avg: 0.084   |
| <b>DA2-BrAn H-T<br/>CA Non-solvate</b> | N/A                           | N/A                           | N/A          |
| <b>DA2-BrAn H-T<br/>CA Solvate</b>     | 3.661                         | 3.572                         | 0.089        |

| Crystal                                | C-H $\cdots$ S (Å)<br>300 K | C-H $\cdots$ S (Å)<br>100 K | $\Delta$ (Å) |
|----------------------------------------|-----------------------------|-----------------------------|--------------|
| <b>DA2-BrAn H-T</b>                    | 3.763                       | 3.735                       | 0.028        |
| <b>DA2-BrAn H-H</b>                    | 3.729                       | 3.692                       | 0.037        |
| <b>DA2-BrAn H-T<br/>CA Non-solvate</b> | N/A                         | N/A                         | N/A          |
| <b>DA2-BrAn H-T<br/>CA Solvate</b>     | 3.818                       | 3.771                       | 0.051        |
|                                        | 3.880                       | 3.877                       | 0.003        |

| Crystal             | C-H $\cdots\pi$ (Å)<br>300 K | C-H $\cdots\pi$ (Å)<br>100 K | $\Delta$ (Å) |
|---------------------|------------------------------|------------------------------|--------------|
| <b>DA2-BrAn H-T</b> | 3.788                        | 3.675                        | 0.113        |
|                     | 3.701                        | 3.612                        | 0.089        |
|                     | 3.929                        | 3.742                        | 0.187        |
|                     | 3.450                        | 3.390                        | 0.060        |
| <b>DA2-BrAn H-H</b> | N/A                          | N/A                          | N/A          |

|                       |       |       |       |
|-----------------------|-------|-------|-------|
| <b>DA2-BrAn H-T</b>   | 3.853 | 3.787 | 0.066 |
| <b>CA Non-solvate</b> | 3.955 | 3.837 | 0.118 |
| <b>DA2-BrAn H-T</b>   | 3.869 | 3.838 | 0.031 |
| <b>CA Solvate</b>     | 3.870 | 3.824 | 0.046 |
|                       | 3.615 | 3.543 | 0.072 |
|                       | 3.621 | 3.574 | 0.047 |

| <b>Crystal</b>        | allyl...allyl (Å)<br>300 K | allyl...allyl (Å)<br>100 K | $\Delta$ (Å) |
|-----------------------|----------------------------|----------------------------|--------------|
| <b>DA2-BrAn H-T</b>   | N/A                        | N/A                        | N/A          |
| <b>DA2-BrAn H-H</b>   | N/A                        | N/A                        | N/A          |
| <b>DA2-BrAn H-T</b>   | 3.801                      | 3.654                      | 0.147        |
| <b>CA Non-solvate</b> | 3.765                      | 3.736                      | 0.029        |
|                       | 3.842                      | 3.742                      | 0.100        |
| <b>DA2-BrAn H-T</b>   |                            |                            |              |
| <b>CA Solvate</b>     | 4.301                      | 4.182                      | 0.119        |

| <b>Crystal</b>        | S...S (Å)<br>300 K | S...S (Å)<br>100 K | $\Delta$ (Å) |
|-----------------------|--------------------|--------------------|--------------|
| <b>DA2-BrAn H-T</b>   | N/A                | N/A                | N/A          |
| <b>DA2-BrAn H-H</b>   | N/A                | N/A                | N/A          |
| <b>DA2-BrAn H-T</b>   | 3.681              | 3.652              | 0.029        |
| <b>CA Non-solvate</b> |                    |                    |              |
| <b>DA2-BrAn H-T</b>   |                    |                    |              |
| <b>CA Solvate</b>     | 3.548              | 3.416              | 0.132        |

| <b>Crystal</b>        | Br... $\pi$ (Å)<br>300 K | Br... $\pi$ (Å)<br>100 K | $\Delta$ (Å) |
|-----------------------|--------------------------|--------------------------|--------------|
| <b>DA2-BrAn H-T</b>   | N/A                      | N/A                      | N/A          |
| <b>DA2-BrAn H-H</b>   | N/A                      | N/A                      | N/A          |
| <b>DA2-BrAn H-T</b>   | 3.654                    | 3.537                    | 0.117        |
| <b>CA Non-solvate</b> |                          |                          |              |
| <b>DA2-BrAn H-T</b>   | 3.844                    | 3.716                    | 0.128        |
| <b>CA Solvate</b>     | 3.833                    | 3.735                    | 0.098        |

#### 4. Expansivity Indicatrix Diagrams

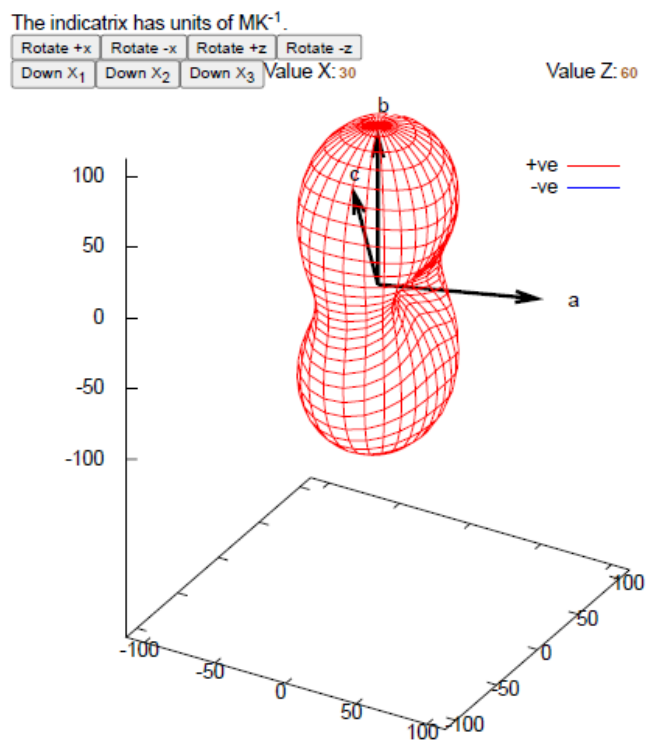

**Figure S1.** Thermal expansivity indicatrix for **DA2-BrAn H-T**.

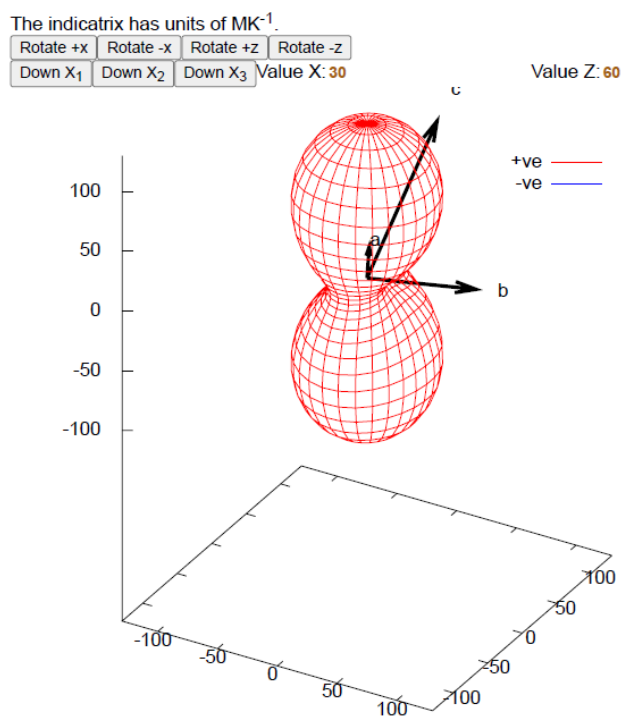

**Figure S2.** Thermal expansivity indicatrix for **DA2-BrAn H-H**.

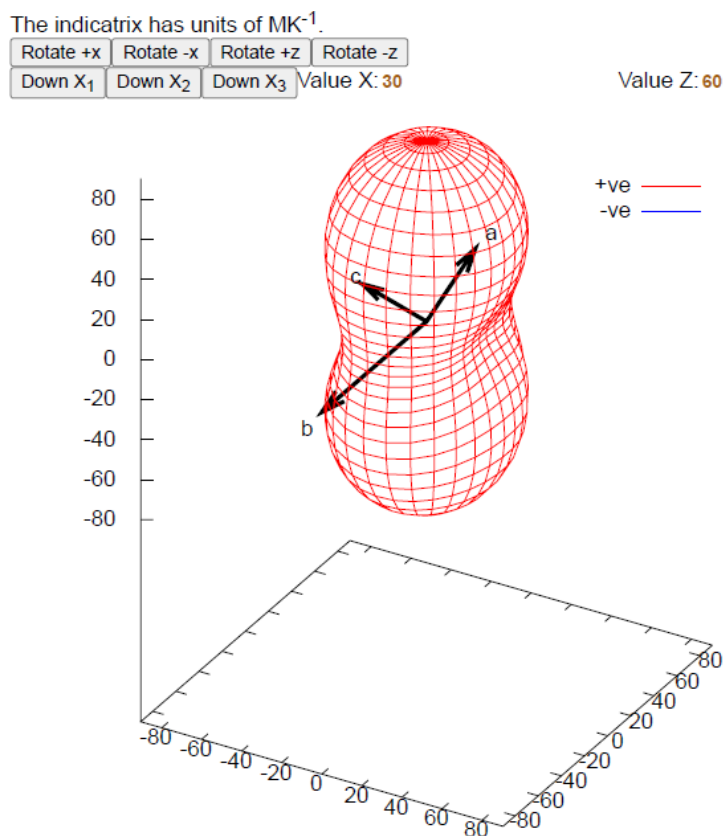

**Figure S3.** Thermal expansivity indicatrix for **DA2-BrAn CA Nonsolvate**.

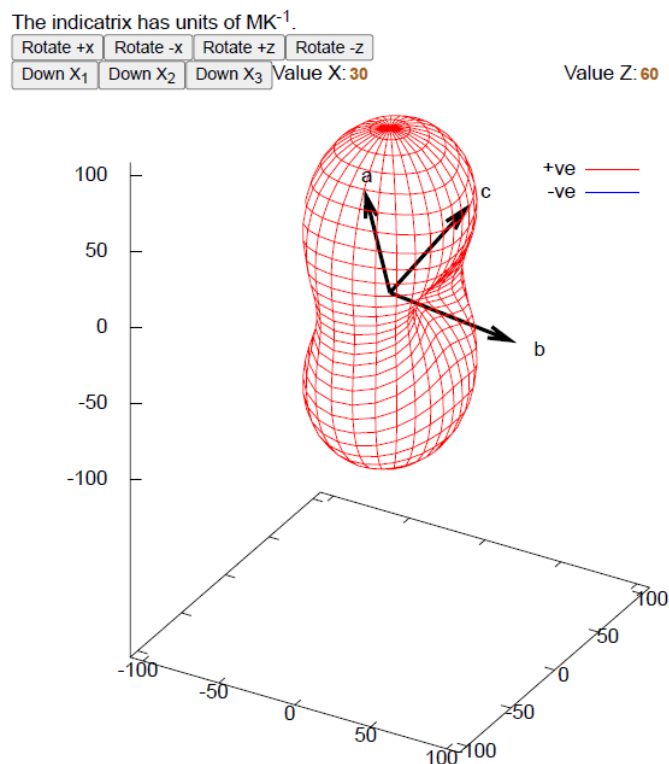

**Figure S4.** Thermal expansivity indicatrix for **DA2-BrAn CA Solvate**.

## 5. NMR Spectra of the Compounds

All the compounds were dissolved in  $\text{CDCl}_3$  or  $\text{DMSO-d}_6$  for NMR experiments. NMR data was collected using a JOEL ECS 400 MHZ Spectrometer.

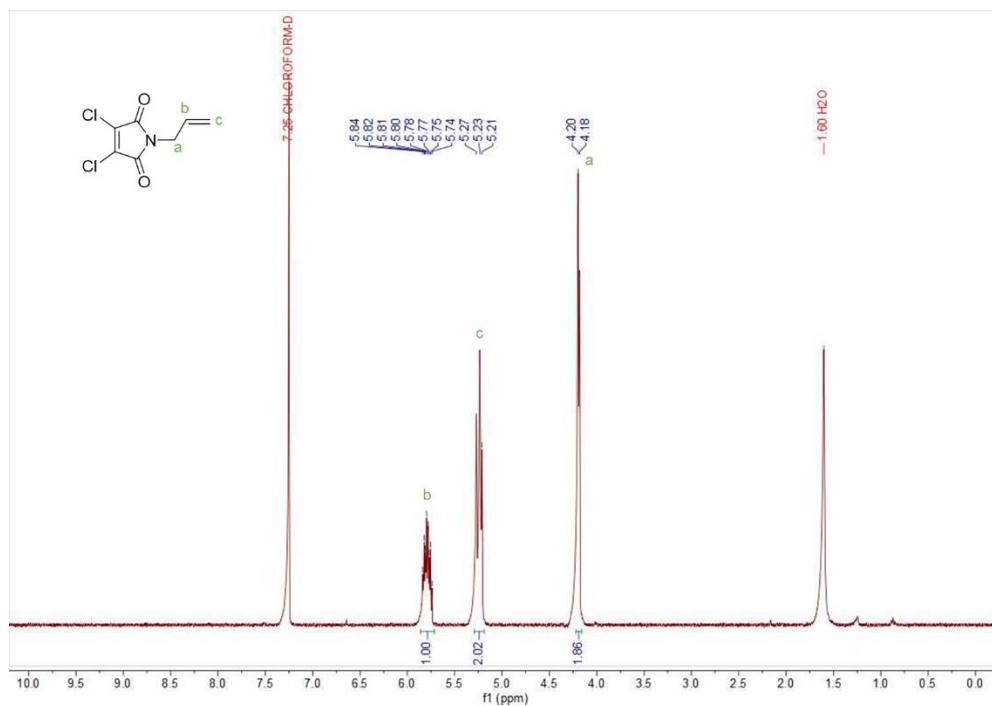

Figure S5.  $^1\text{H}$  NMR spectrum for compound DA1.

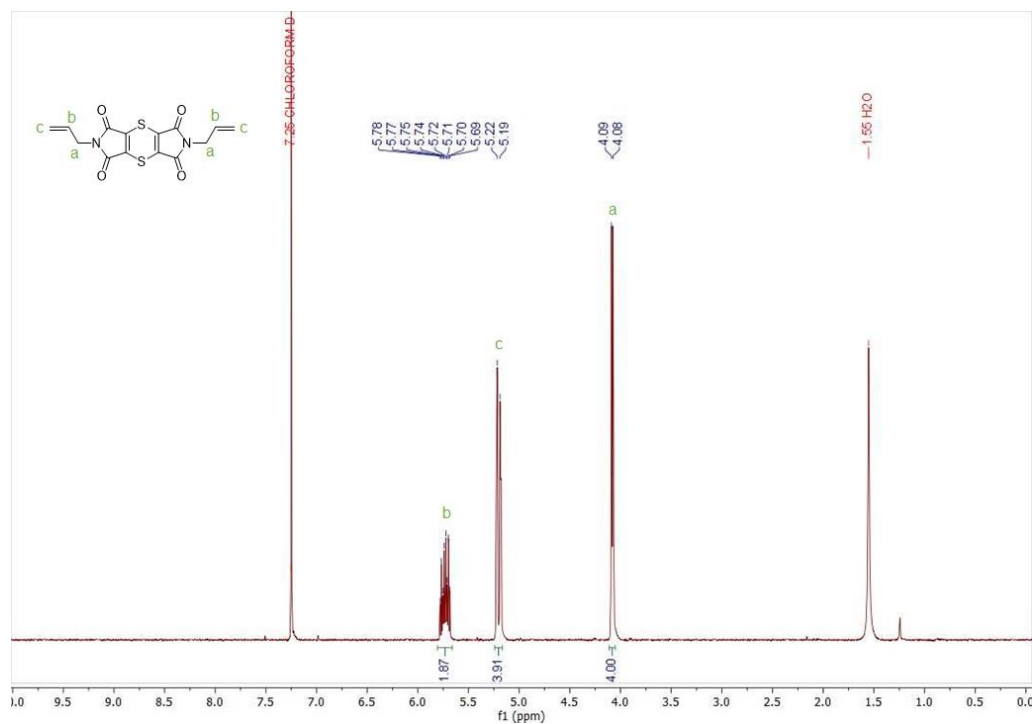

Figure S6.  $^1\text{H}$  NMR spectrum for compound DA2.

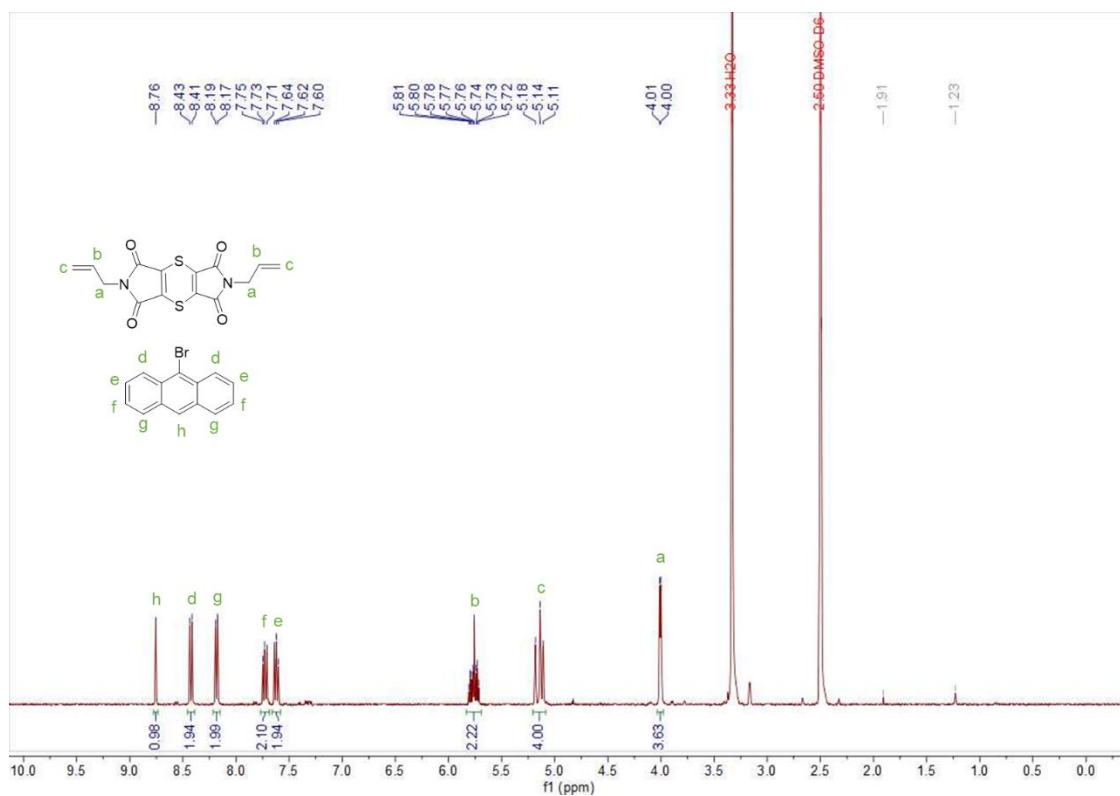

Figure S7.  $^1\text{H}$  NMR spectrum for DA2-BrAn.

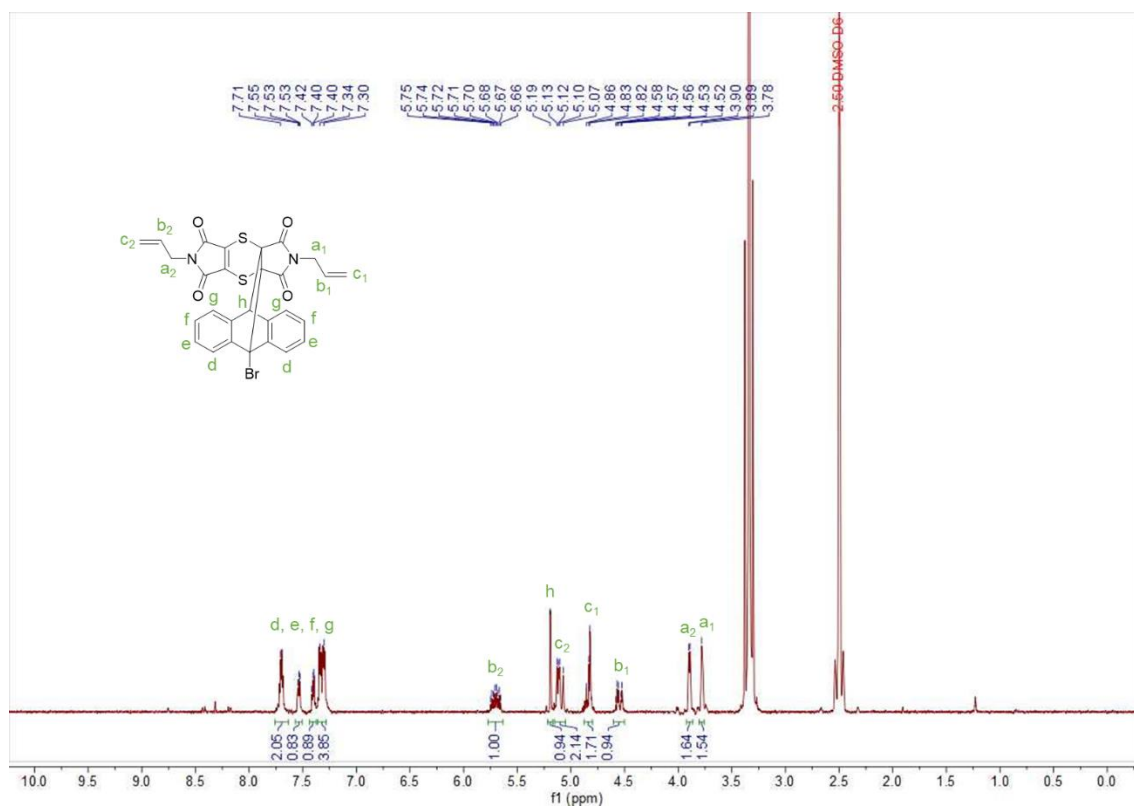

Figure S8.  $^1\text{H}$  NMR spectrum for DA2-BrAn CA Nonsolvate.



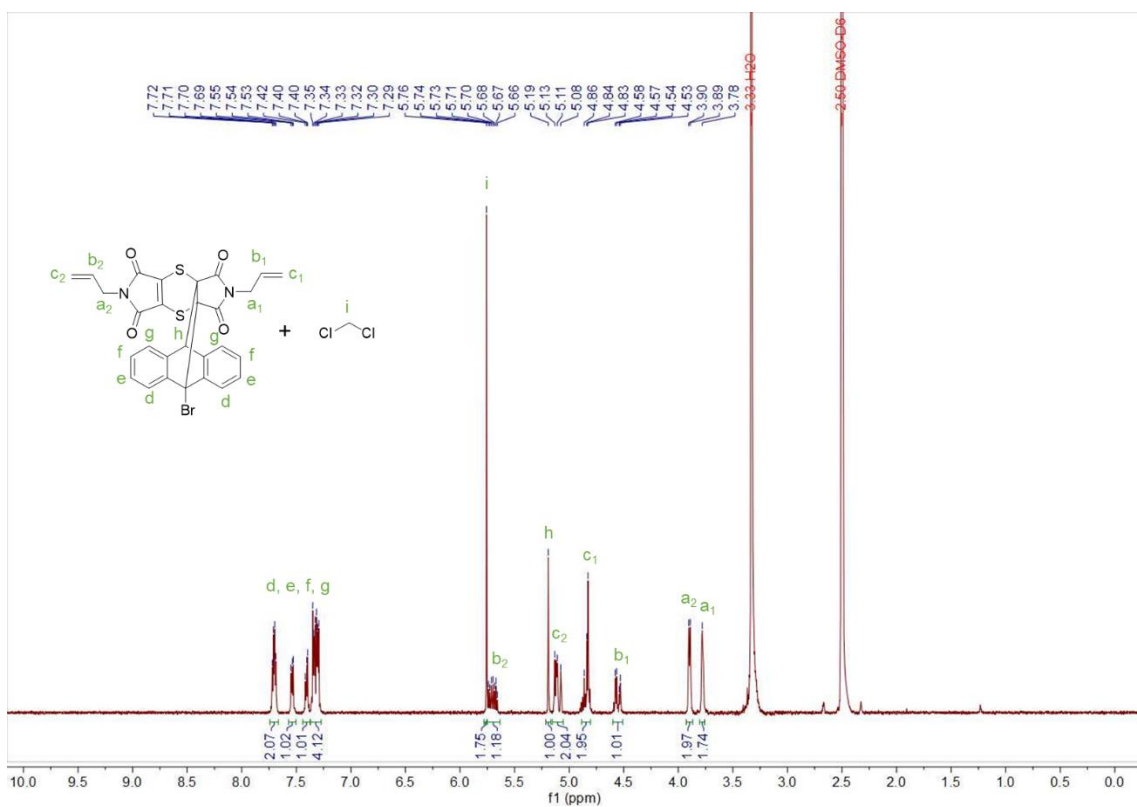

Figure S9. <sup>1</sup>H NMR spectrum for compound DA2-BrAn CA Solvate.

## 6. Optical Microscope Images of Crystals

Optical images were collected on a Leica DM2700 M microscope equipped with a Leica MC170 HD microscope camera.

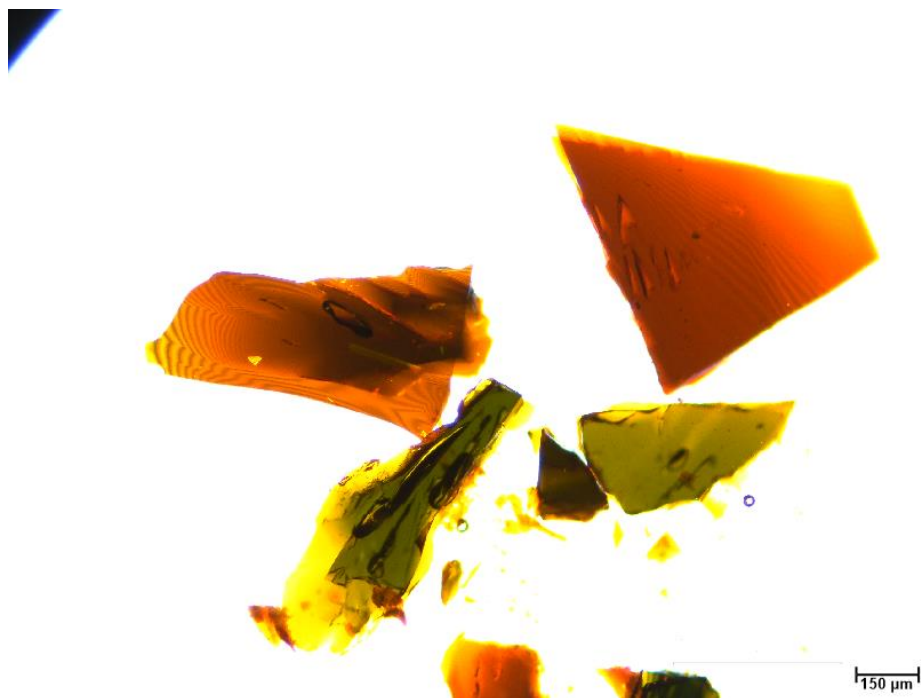

**Figure S10.** Optical microscope image of **DA2-BrAn H-T** crystals.

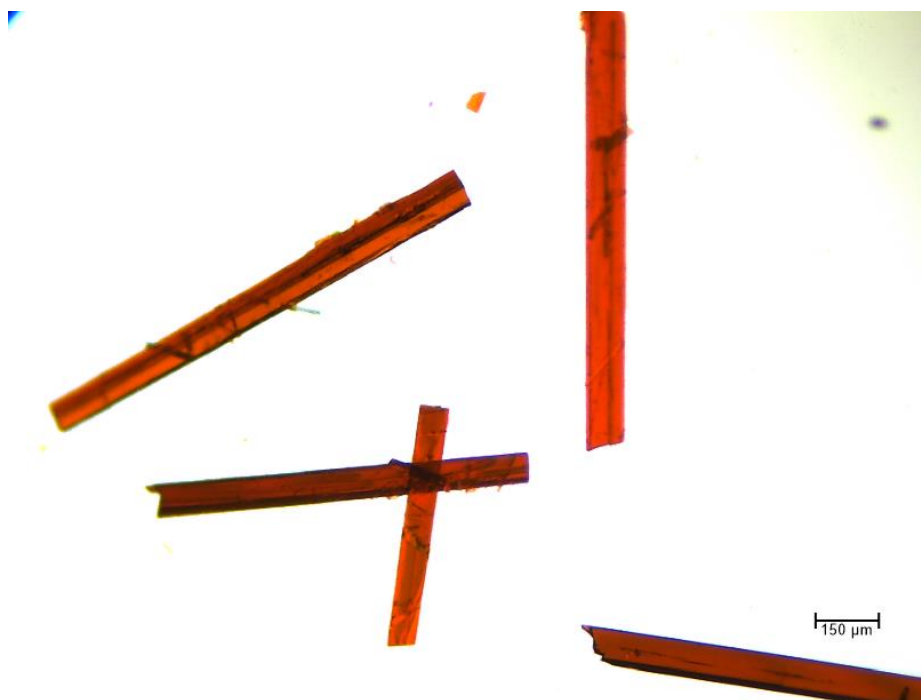

**Figure S11.** Optical microscope image of **DA2-BrAn H-H** crystals.

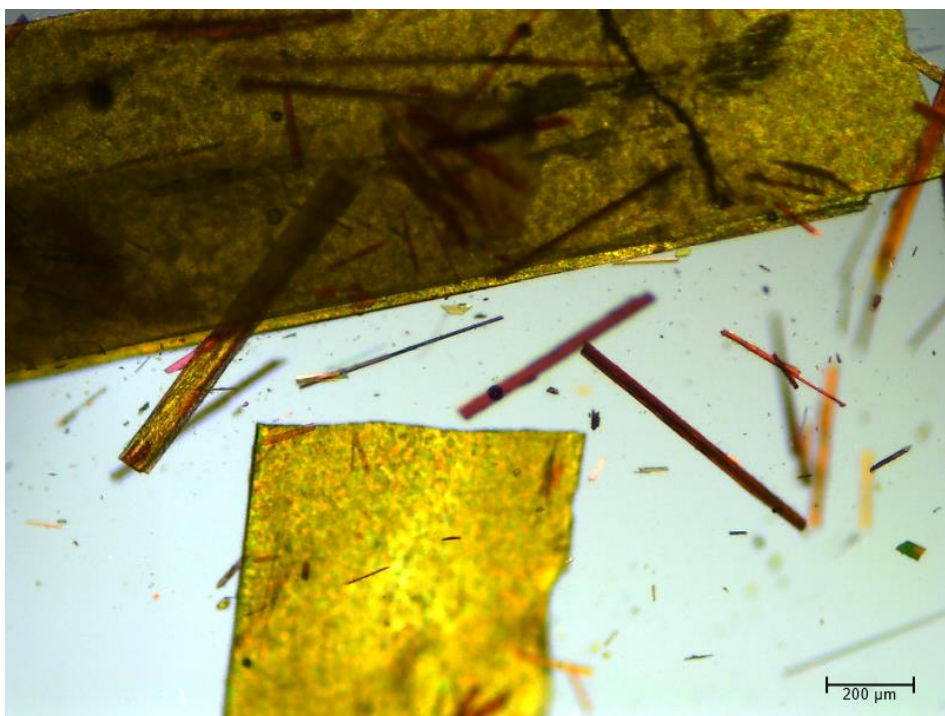

**Figure S12.** Optical microscope image of **DA2-BrAn H-T CA** crystals (yellow plates) before recrystallization, along with a couple of unreacted H-H cocrystals (needles).

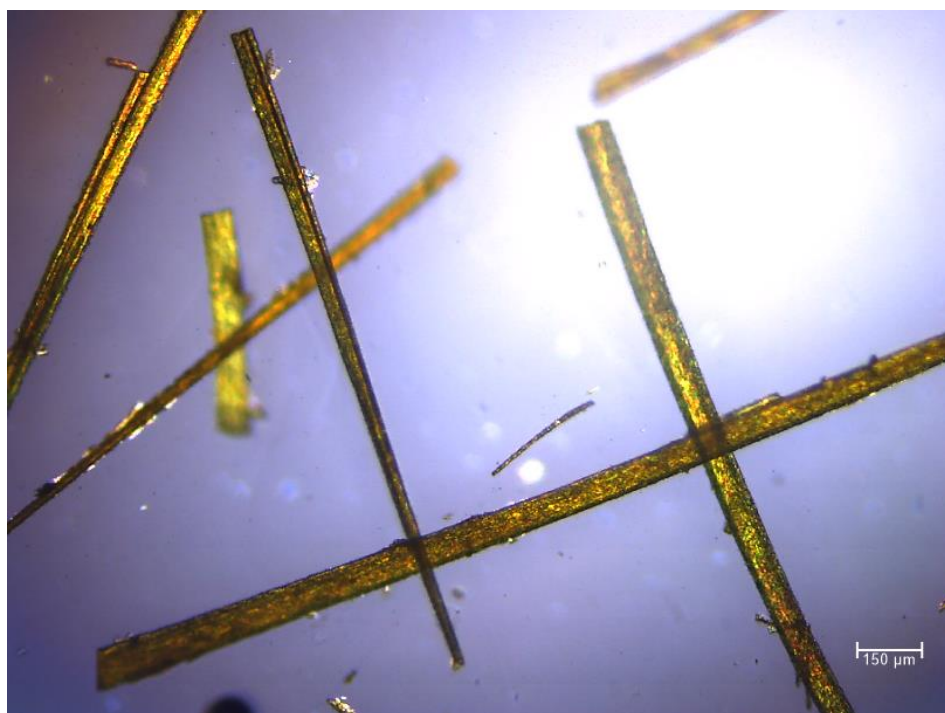

**Figure S13.** Optical microscope image of **DA2-BrAn H-H CA** crystals before recrystallization.

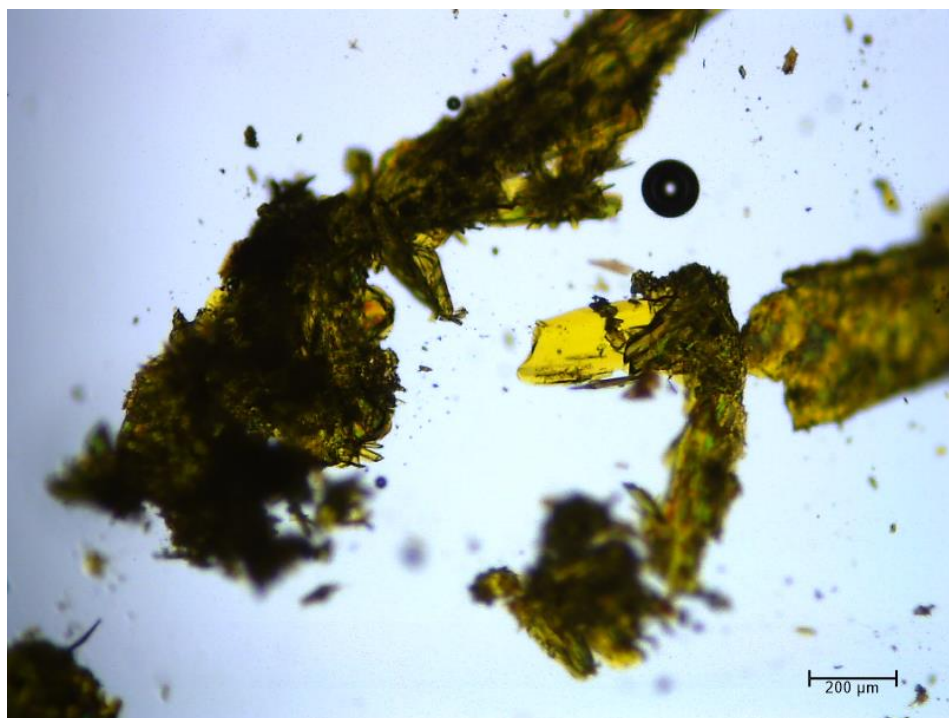

**Figure S14.** Optical microscope image of **DA2-BrAn CA non-solvate** crystals.

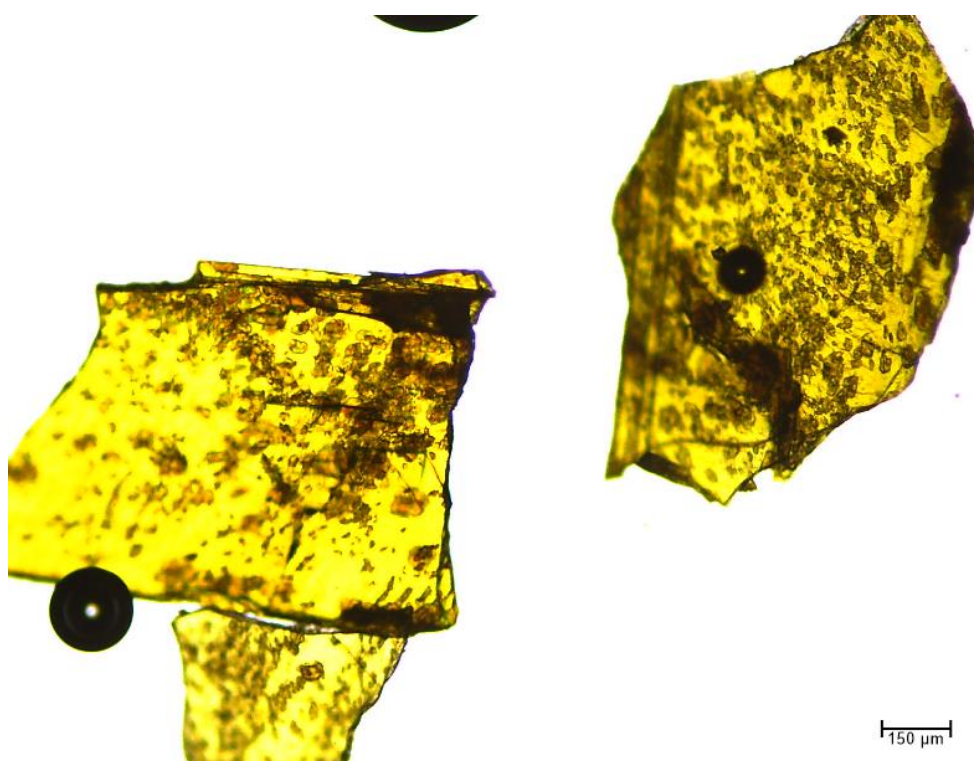

**Figure S15.** Optical microscope image of **DA2-BrAn CA solvate** crystals.

## 7. PXRD Patterns

The diffraction patterns for all samples were collected on a Rigaku MiniFlex II powder diffractometer operating in the Bragg-Brentano geometry. An X-ray diffraction pattern was obtained by scanning a  $2\theta$  range of  $3\text{-}60^\circ$ , step size =  $0.02^\circ$ , and scan time of  $2^\circ/\text{minute}$ . The X-ray source was Cu  $K\alpha$  radiation ( $\lambda = 1.5418 \text{ \AA}$ ) with an anode voltage of 30 kV and a current of 15 mA. Diffraction intensities were recorded on a position sensitive detector (D/teX Ultra). The sample was prepared as a standard powder mount. All semi-quantitative weight percentages were calculated using the whole-pattern fitting software contained within MDI JADE 2022 using the structures with CCDC numbers 2179705 (H-H 300 K) and 2179716 (H-T 300 K) as references.

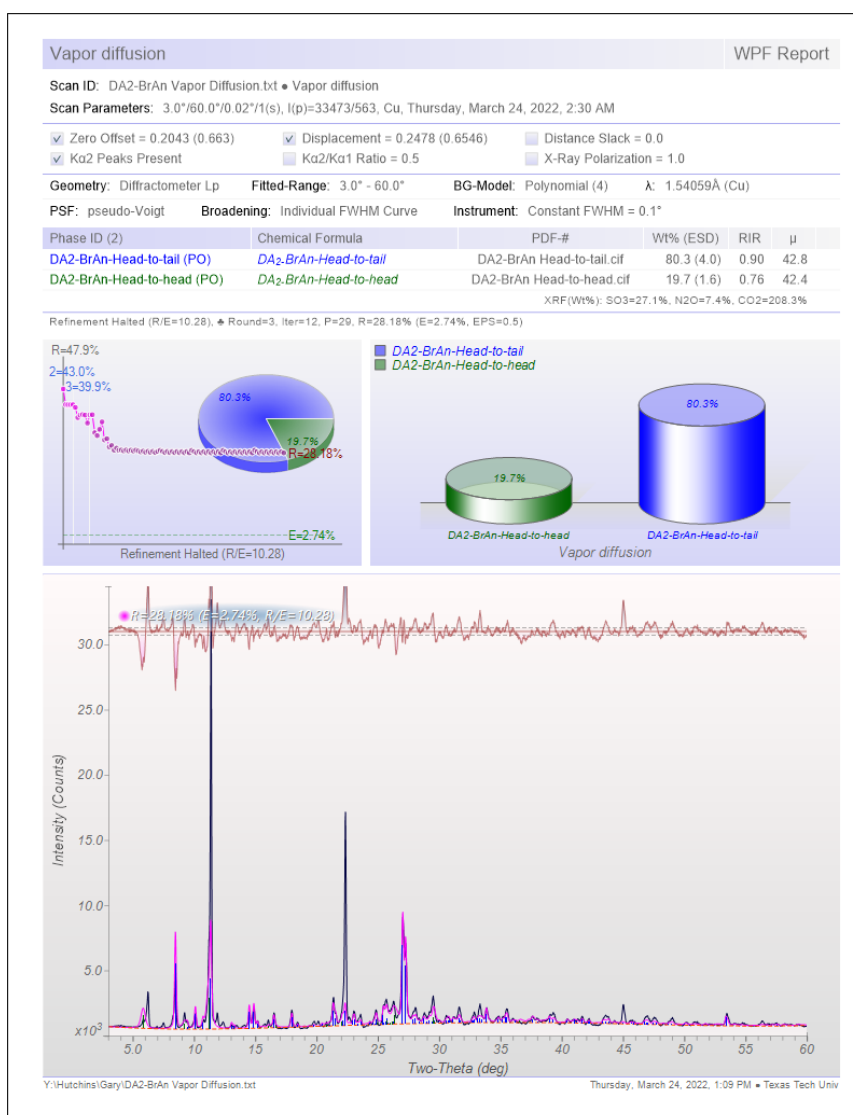

**Figure S16.** PXRD whole pattern fitting analysis for **DA2-BrAn** from vapor diffusion experiment.



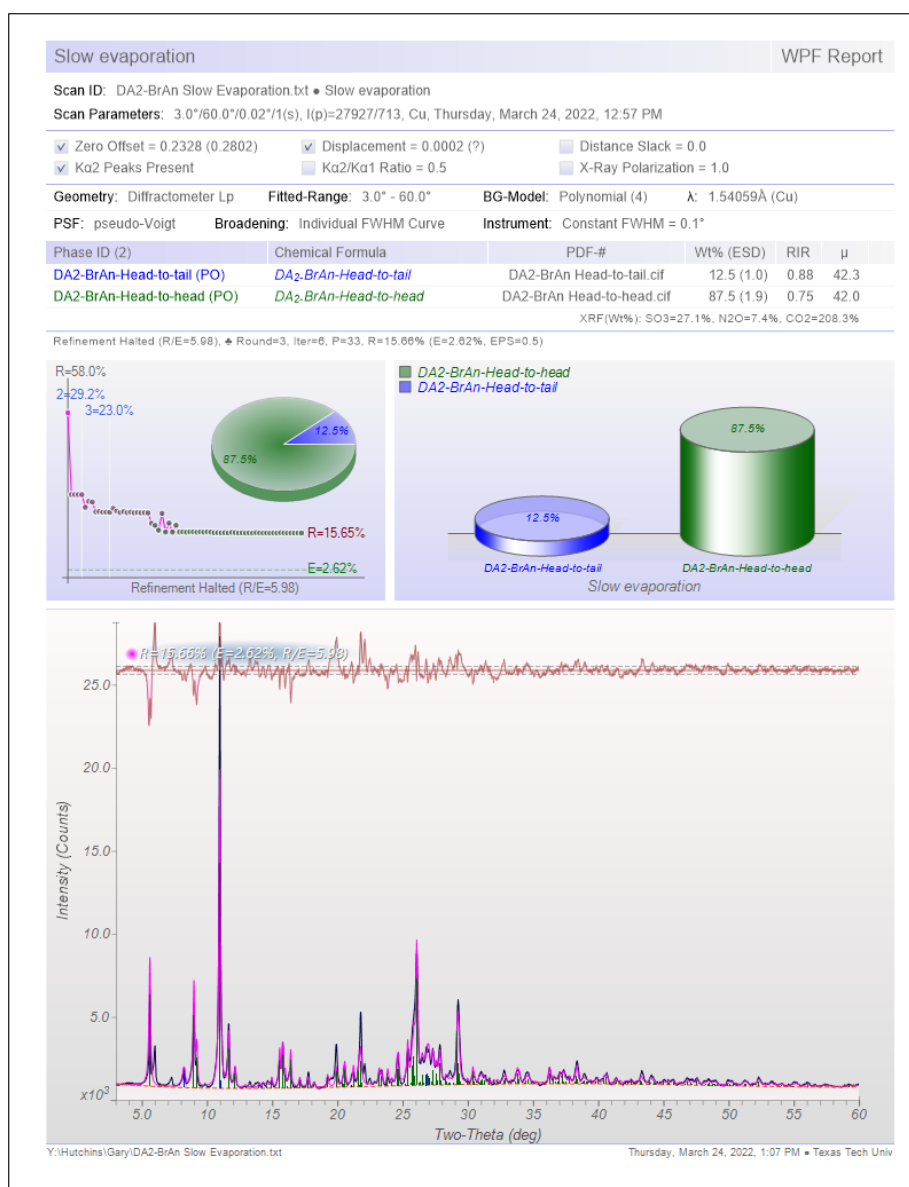

**Figure S17.** PXR D whole pattern fitting analysis for **DA2-BrAn** from slow evaporation experiment.

## 8. Variation of the Unit Cell Parameters

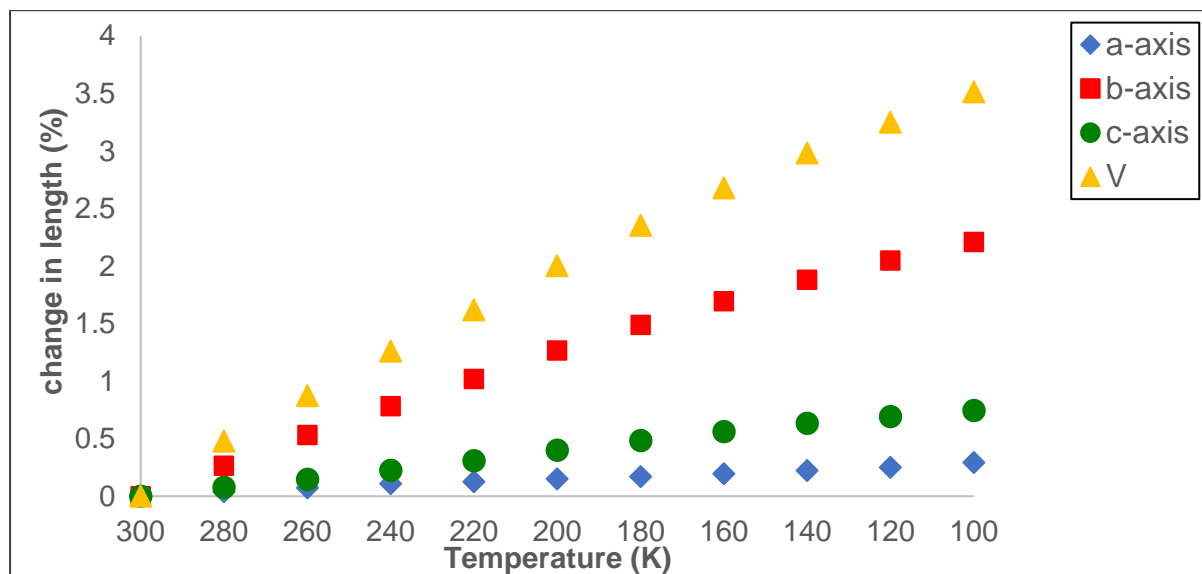

**Figure S18.** Percent change in length as a function of temperature for DA2-BrAn H-T.

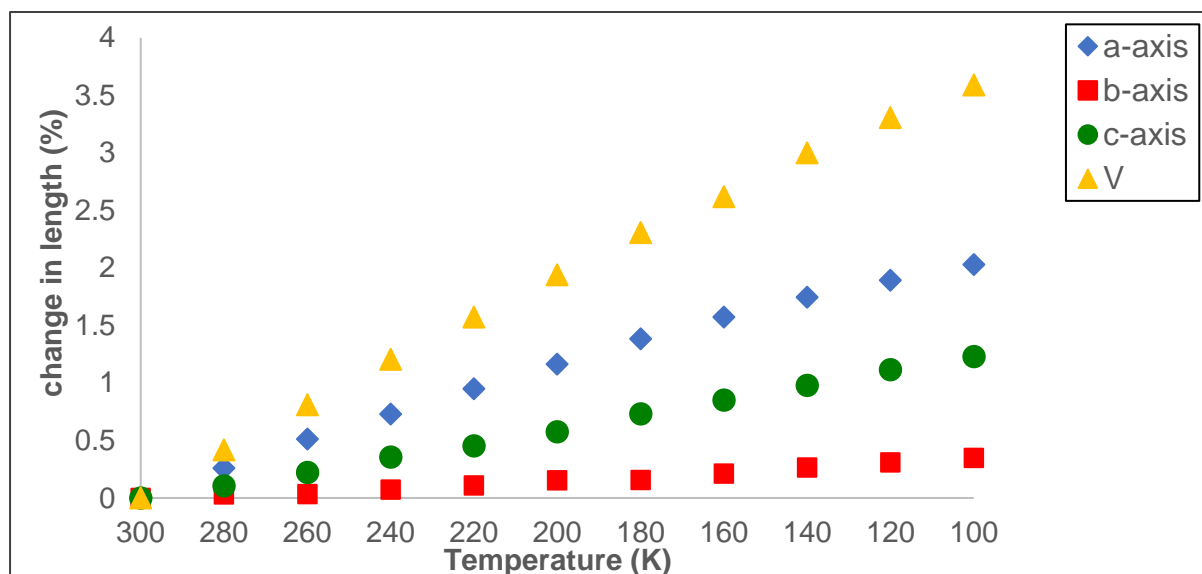

**Figure S19.** Percent change in length as a function of temperature for DA2-BrAn H-H.

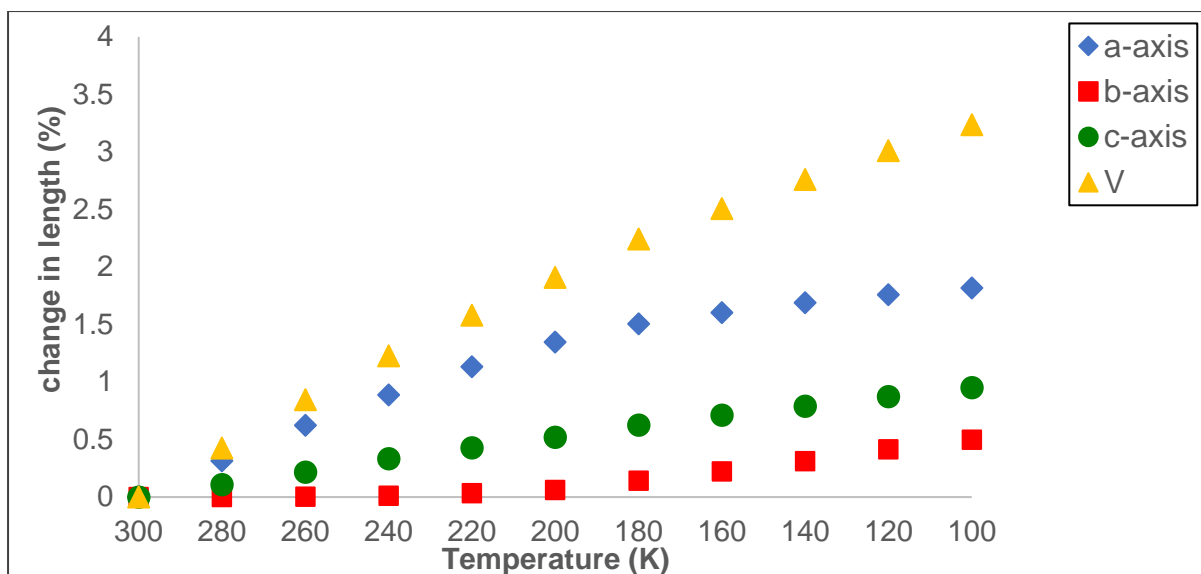

**Figure S20.** Percent change in length as a function of temperature for **DA2-BrAn CA Nonsolvate**.

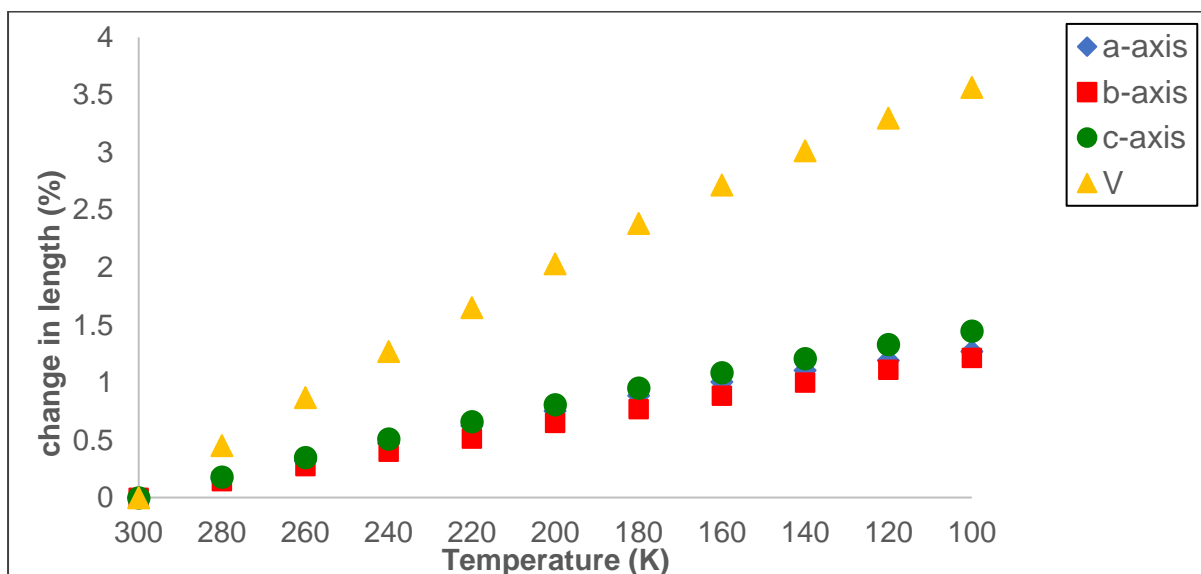

**Figure S21.** Percent change in length as a function of temperature for **DA2-BrAn CA Solvate**. The *a*-axis symbols are under the *b*- and *c*- axis symbols.



## 9. Additional Figures

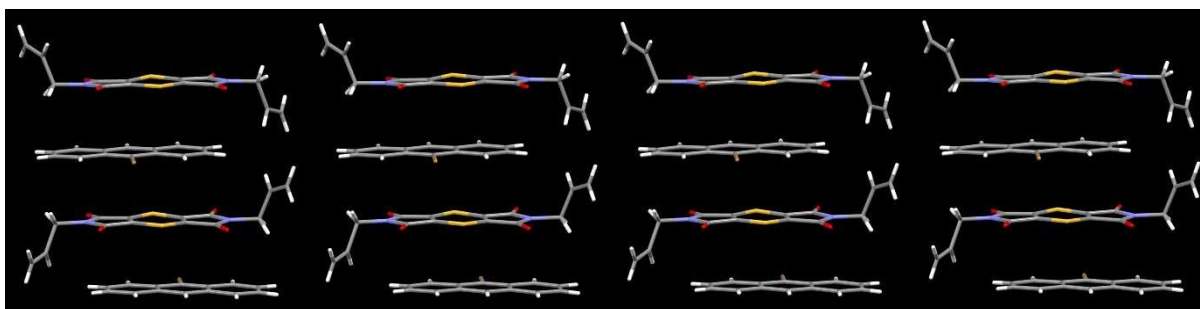

**Figure S22.** Expanded crystal packing of **DA2-BrAn H-T** cocrystal highlighting the arrangement of neighboring stacks.

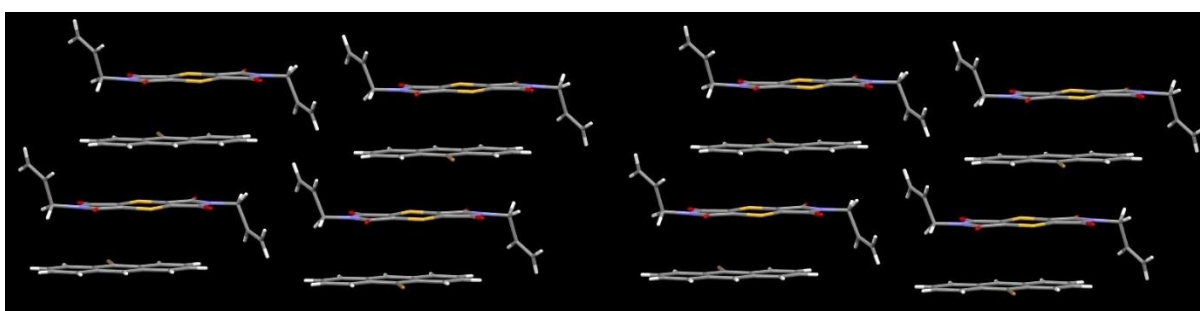

**Figure S23.** Expanded crystal packing of **DA2-BrAn H-H** cocrystal highlighting the arrangement of neighboring stacks.

## 10. Variable-Temperature Stage Images

A Leica DM2700 M microscope equipped with a Leica MC170 HD microscope camera was used to collect images during a variable-temperature experiment. A Linkam LTS420 heating/cooling stage equipped with a Linkam T96 Controller and liquid nitrogen cooling system was used to house the crystals during the experiment and control the temperature. Crystals were placed on a glass slide in a minimal amount of type NVH immersion oil by Cargille to keep them in place during the experiment.

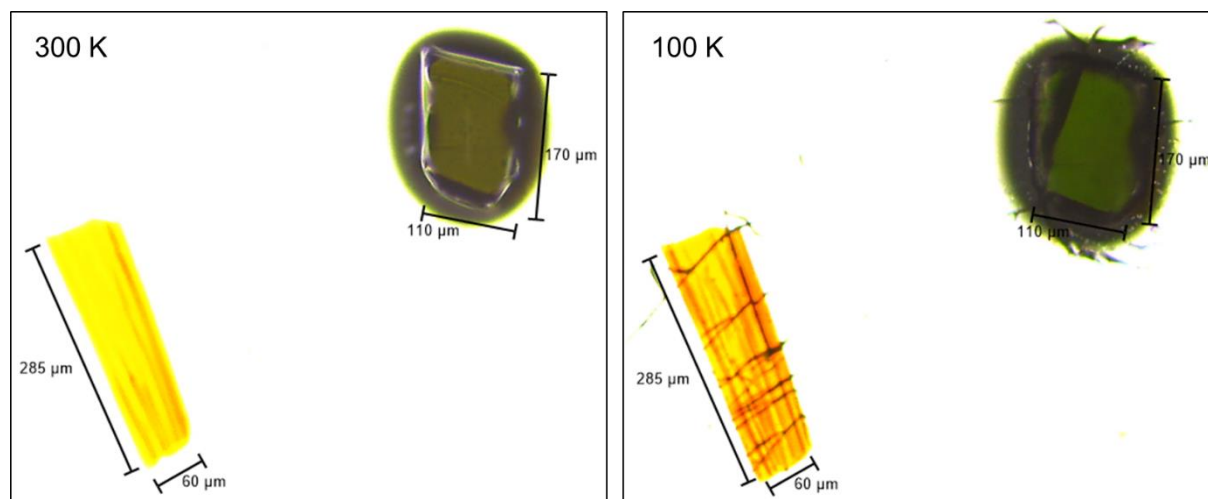

**Figure S24.** Images of DA2-BrAn H-H and H-T cocrystals upon warming to 300 K and cooling to 100 K.

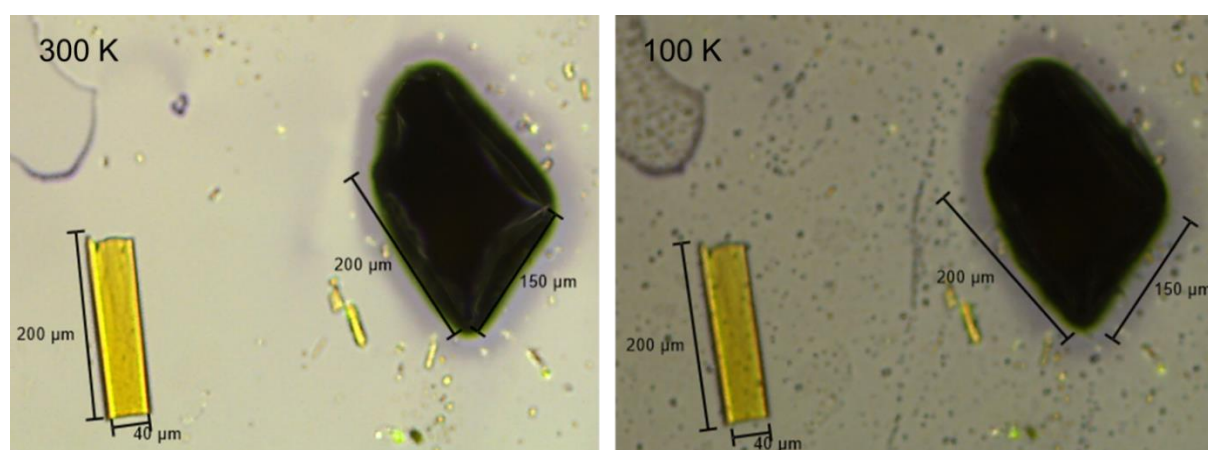

**Figure S25.** Images of DA2-BrAn CAs (before recrystallization) upon warming to 300 K and cooling to 100 K.

## 11. References

1. Khorasani, S.; Botes, D. S.; Fernandes, M. A.; Levendis, D. C., *CrystEngComm* **2015**, *17*, 8933-8945.
2. CrysAlis<sup>Pro</sup> (2018) Oxford Diffraction Ltd.
3. SCALE3 ABSPACK (2005) Oxford Diffraction Ltd.
4. Sheldrick, G. M. SHELXT - Integrated space-group and crystal-structure determination. *Acta Crystallogr., Sect. A: Found. Adv.* **2015**, *A71*, 3-8.
5. Sheldrick, G. M. Crystal structure refinement with SHELXL. *Acta. Cryst.* **2015**, *71*, 3-8.
6. Dolomanov, O. V.; Bourhis, L. J.; Gildea, R. J.; Howard, J. A. K.; Puschmann, H. OLEX2: a complete structure solution, refinement and analysis program. *J. Appl. Cryst.* **2009**, *42*, 339-341.
7. Cliffe, M. J.; Goodwin, A. L. *J. Appl. Cryst.* **2012**, *45*, 1321-1329.
